1 RESEARCH ARTICLE

2

3 **Gene conversion facilitates the adaptive**  
4 **evolution of self-resistance in highly toxic newts**

5 Kerry L Gendreau<sup>1\*</sup>, Angela D Hornsby<sup>1,2</sup>, Michael TJ Hague<sup>3</sup>, Joel W McGlothlin<sup>1</sup>

6

7 <sup>1</sup> Department of Biological Sciences, Virginia Tech, Blacksburg, United States; <sup>2</sup> Philip  
8 L. Wright Zoological Museum, Division of Biological Sciences, University of Montana,  
9 Missoula, United States; <sup>3</sup> Division of Biological Sciences, University of Montana,  
10 Missoula, MT, United States

11

12 \* For correspondence: [kerryg@vt.edu](mailto:kerryg@vt.edu)

13

14

15 **Abstract** *Taricha* newts contain high concentrations of the deadly toxin TTX as an  
16 antipredator defense, requiring them to be physiologically resistant to their own toxin. Here, we  
17 reconstruct the origins of TTX self-resistance by sequencing the voltage-gated sodium channel  
18 (*SCNA*) gene family, the target of TTX, in newts and related salamanders. We show that extreme  
19 resistance in newts consists of a mixture of ancient changes and lineage-specific substitutions  
20 and that the nonsynonymous substitution rate is elevated in newts, suggesting positive selection.  
21 We also identify a novel exon duplication within *SCN4A* encoding an expressed TTX-binding  
22 site. Two resistance-conferring changes within newts appear to have spread via nonallelic gene  
23 conversion: in one case, one codon was copied between paralogs, and in the second, multiple  
24 substitutions were homogenized between the duplicate exons of *SCN4A*. Our results demonstrate  
25 that gene conversion can accelerate the coordinated evolution of gene families in response to  
26 selection.

## 27 Introduction

28 Reconstructing the histories of complex adaptations and identifying their molecular  
29 underpinnings are two of the primary goals of evolutionary biology. Fitting evolutionary models  
30 to molecular sequences in a phylogenetic context can help piece together the key steps in  
31 adaptive evolution and uncover the relative contributions of selection and other evolutionary  
32 mechanisms to adaptive phenotypic evolution (Smith et al. 2020). Comparative studies of  
33 convergence, or the repeated evolution of characters within different lineages undergoing the  
34 same environmental challenges, provide powerful evidence of both adaptation and connections  
35 between genetic and phenotypic change (Losos 2011). Investigations into the molecular basis of  
36 convergence have revealed multiple occurrences of parallelism, where different lineages have  
37 evolved changes within the same proteins, and occasionally at the same amino acid sites, in  
38 response to shared selective pressures, such as insects that have evolved the ability to feed on  
39 toxic plants (Zhen et al. 2012) and populations of ducks and humans living at high elevations  
40 (Graham and McCracken 2019). Such patterns support important roles for both positive selection  
41 and constraint in the origin of complex adaptations (reviewed by Storz 2016).

42 Resistance to tetrodotoxin (TTX), a potent neurotoxin, has evolved convergently in  
43 several distantly related organisms, including pufferfish, snakes, and newts (reviewed by Soong  
44 and Venkatesh 2006; Toledo et al. 2016), and therefore offers an ideal system to investigate the  
45 molecular basis of adaptive evolution (Arbuckle et al. 2017). The genetic basis of TTX  
46 resistance, which is well established in tetrodotoxic puffer fish (Jost et al. 2008) and in snakes  
47 that consume TTX-bearing prey (Feldman et al. 2012; Geffeney et al. 2002; McGlothlin et al.  
48 2014; McGlothlin et al. 2016), involves amino acid substitutions in the toxin's target, voltage-  
49 gated sodium channels (*SCNA* genes or  $\text{Na}_v$  proteins).  $\text{Na}_v$  channels are responsible for the  
50 initiation and propagation of action potentials in excitable cells and are composed of four  
51 homologous domains (DI–DIV), each comprising six transmembrane helices and an extracellular  
52 pore-loop region (the P-loop; Fux et al. 2018). The four homologous P-loops, one in each  
53 domain, form a pore within the membranes of excitable cells to selectively allow sodium ions to  
54 cross when the channel is open. TTX exerts its effects by binding to the P-loops of sensitive  
55 channels and preventing sodium entry into cells, thus blocking action potentials. Gene

**Table 1.** Nomenclature for voltage-gated sodium channel genes. Patterns of tissue expression are inferred from studies of gene orthologs in mammals (reviewed in Yu and Catterall 2003)

| Gene name    | Protein name | Tissue expression                 |
|--------------|--------------|-----------------------------------|
| <i>SCN1A</i> | Nav1.1       | Brain                             |
| <i>SCN2A</i> | Nav1.2       | Brain                             |
| <i>SCN3A</i> | Nav1.3       | Brain                             |
| <i>SCN4A</i> | Nav1.4       | Muscle                            |
| <i>SCN5A</i> | Nav1.5       | Heart                             |
| <i>SCN8A</i> | Nav1.6       | Brain / peripheral nervous system |

56 duplication events have resulted in six *SCNA* paralogs, each with tissue-specific expression, that  
57 are shared across all tetrapods (Table 1), with additional lineage-specific duplications occurring  
58 in amniotes (Widmark et al. 2011; Zakon 2012). Because the structure of these paralogs is highly  
59 conserved, each has the potential to be blocked by TTX if it lacks resistance-conferring  
60 substitutions.

61 Species that possess or consume TTX must either have a full complement of resistant  
62 paralogs or otherwise shield sodium channels from contact with the toxin. Indeed, resistant  
63 substitutions are present in all eight of the *SCNA* genes within the genomes of multiple species of  
64 TTX-bearing pufferfish (from the family Tetraodontidae; Jost et al. 2008) and in six of the nine  
65 *SCNA* genes in *Thamnophis sirtalis* snakes that consume TTX-bearing *Taricha* newts  
66 (McGlothlin et al. 2014; Perry et al. 2018). The three brain channels *SCN1A*, *SCN2A*, and  
67 *SCN3A* of snakes remain TTX sensitive, but presumably are protected from TTX by the blood-  
68 brain barrier (McGlothlin et al. 2014). In snakes, the evolution of extreme TTX resistance  
69 appears to follow a predictable, stepwise substitution pattern across TTX-exposed members of  
70 the *SCNA* gene family, with substitutions in heart and peripheral nerve channels preceding those  
71 in the muscle channel gene, *SCN4A*, which evolves resistance only in snakes locked in  
72 coevolutionary arms races with highly tetrodotoxic amphibian prey (Feldman et al. 2012;  
73 McGlothlin et al. 2016; Perry et al. 2018).

74 Less is known about the evolutionary history of TTX resistance in *Taricha* newts, the  
75 highly toxic coevolutionary partner of *Thamnophis* (Brodie and Brodie 1990; Brodie et al. 2002;  
76 Hague et al. 2020; Williams et al. 2010). The extreme toxicity of *Taricha*, which has been

77 elaborated by the ongoing coevolutionary arms race with garter snakes, builds upon lower levels  
78 of toxicity that evolved ~40 million years ago (mya) within “modern” newts (tribe Molgini;  
79 Hanifin and Gilly 2015; divergence date estimated by Hime et al. 2021). The evolution of  
80 toxicity necessitates the evolution of toxin autoresistance so that a prey species is not  
81 incapacitated by its own antipredator defense (Jost et al. 2008; Márquez et al. 2019; Tarvin et al.  
82 2017; Toledo et al. 2016). Understanding the timing and details of this autoresistance can shed  
83 light on the genetic processes underlying the predator-prey arms race. Hanifin and Gilly (2015)  
84 compared the sequences of one sodium channel gene, the muscle paralog *SCN4A*, across several  
85 salamander species and identified substitutions in the P-loops of DIII and DIV that provide  
86 extreme TTX resistance to the muscles of TTX-bearing newts. Importantly, the sister group of  
87 toxic newts had substitutions in the same gene providing more moderate resistance, indicating  
88 that the evolution of autoresistance in a common ancestor paved the way for the evolution of  
89 extreme toxicity. More recently, Vaelli et al. (2020) used transcriptome sequencing to  
90 characterize the genetic basis of physiological resistance to TTX in *Taricha granulosa* and  
91 identified substitutions within TTX-binding regions in the other five *SCNA* paralogs, many of  
92 which occur in within the P-loop of DI. However, because it is unknown whether other  
93 salamander species possess TTX resistance in these paralogs, the order and timing of the  
94 evolutionary events leading to autoresistance in toxic newts is still unknown. Furthermore, no  
95 studies to date have applied evolutionary models to test for the relative importance of  
96 mechanisms such as positive selection, relaxed constraint, and interlocus gene conversion in the  
97 evolution of newt TTX resistance.

98         Here, we trace the evolutionary history of the entire *SCNA* gene family across the  
99 salamander phylogeny to show the order in which resistant substitutions appeared. Using  
100 published genome sequences and newly generated sequence data, we characterize the genomic  
101 structure of *SCNA* genes in newts and their relatives, inferring the timing of resistant  
102 substitutions leading to the extreme TTX resistance observed across all *SCNA* paralogs in  
103 *Taricha* newts (Vaelli et al. 2020). We estimate rates of synonymous and nonsynonymous  
104 substitution to identify positive selection. In addition, we assess the potential of nonallelic gene  
105 conversion, a process by which sequence is copied from one paralog to another (Chen et al.  
106 2007), to act as a source of adaptive variation. Combining these data provides insight into the  
107 evolutionary mechanisms underlying the origin of a uniquely potent chemical defense.

## 108 **Results**

### 109 **Genomic structure and phylogenetics of voltage-gated sodium channels**

110 We used targeted sequence capture to characterize *SCNA* sequences from the genomes of five  
111 salamander species (order Urodela), including three TTX-bearing newts (family Salamandridae,  
112 subfamily Pleurodelinae, tribe Molgini), *Notophthalmus viridescens*, *Taricha torosa*, and  
113 *Taricha granulosa* ( $n = 3$  diploid individuals of each species), and two less toxic salamanders,  
114 *Cryptobranchus alleganiensis* (Cryptobranchidae) and *Plethodon cinereus* (Plethodontidae,  $n =$   
115 2 each). We also identified *SCNA* sequences within two publicly available salamander genome  
116 sequences: *Ambystoma mexicanum* (Ambystomatidae; Smith et al. 2019; AmexG.v6 assembly)  
117 and *Pleurodeles waltl* (Salamandridae; Elewa et al. 2017) and a full-body transcriptome from the  
118 fire salamander *Salamandra salamandra* (Salamandridae; Goedbloed et al. 2017; BioProject  
119 accession PRJNA607429). The split between *Cryptobranchus* (suborder Cryptobranchoidea) and  
120 all the other salamanders in our study (members of suborder Salamandroidea) represents the  
121 most ancient division in the phylogeny of extant salamanders (~160 mya; Hime et al. 2021).

122 We identified six *SCNA* genes in the genomes of all salamander species, which is  
123 consistent with observations in other amphibians (Zakon et al. 2011). We obtained near full-  
124 length assemblies for all paralogs (Table S1); however, a few exons containing TTX-binding  
125 sites, including exon 15 (encoding the DII P-loop) of *SCN2A* from *N. viridescens* and exon 22  
126 (encoding part of the DIII P-loop) of *SCN2A* for several newt species, were missing from our  
127 assemblies. Polymorphism was rare in our assemblies and we observed few nonsynonymous  
128 mutations within the newt genomes, but we found slightly elevated polymorphism in *N.*  
129 *viridescens* relative to other species (Table S2). No nonsynonymous polymorphisms were  
130 observed within any of the known TTX-binding P-loop regions within any of the species  
131 sequenced for this study.

132 Synteny of *SCNA* genes in *A. mexicanum* is conserved relative to other tetrapods (Fig.  
133 S1), which allowed us to use the *A. mexicanum* sequences as a baseline to confidently identify  
134 *SCNA* paralogs in all species. Three of the paralogs, *SCN1A*, *SCN2A*, and *SCN3A* are arrayed in  
135 tandem on *A. mexicanum* chromosome 9, with *SCN2A* inverted relative to its neighboring  
136 paralogs (Table 2, Fig. S1). The additional three paralogs, *SCN4A*, *SCN5A*, and *SCN8A*, are each  
137 located on separate chromosomes (Table 2). In the gene family tree built from amino acid  
138 sequences, all salamander Na<sub>v</sub>1 proteins formed a monophyletic clade with the corresponding

139 orthologs from the genomes of the frogs *Xenopus tropicalis* and *Nanorana parkeri*, which we  
140 included as outgroups (Fig. 1). The gene family tree constructed from the nucleotide coding  
141 sequences of these genes yielded a similar topology, with each salamander *SCNA* ortholog  
142 forming a monophyletic clade. However, in the nucleotide gene family tree, the three *X.*  
143 *tropicalis* nerve channels Na<sub>v</sub>1.1, Na<sub>v</sub>1.2, and Na<sub>v</sub>1.3 formed a monophyletic clade that is  
144 distinct from the salamander sequences (Fig. S2).

**Table 2.** Locations of voltage-gated sodium channel genes in the *Ambystoma mexicanum* AmexG.v6 genome assembly

| Gene                  | Chromosome | Start       | End         | Strand | Length (bp) |
|-----------------------|------------|-------------|-------------|--------|-------------|
| <i>SCN1A</i>          | 9q         | 503,107,904 | 503,797,933 | +      | 690,029     |
| <i>SCN2A</i>          | 9q         | 507,685,503 | 508,688,108 | -      | 1,002,605   |
| <i>SCN3A</i>          | 9q         | 509,830,827 | 510,576,927 | +      | 746,100     |
| <i>SCN4A</i>          | 13q        | 113,343,821 | 115,707,581 | +      | 2,363,760   |
| <i>SCN4A</i> exon 26b | 13q        | 115,891,071 | 115,892,251 | +      | 1,180       |
| <i>SCN5A</i>          | 2p         | 562,159,042 | 563,030,267 | -      | 871,225     |
| <i>SCN8A</i>          | 3q         | 465,212,114 | 466,692,047 | -      | 1,479,933   |

## 145 **Partial duplication of *SCN4A* and evolution of TTX resistance in duplicated** 146 **domains**

147 Our search of the *A. mexicanum* genome revealed a partial tandem duplication of the 3' end of  
148 the *SCN4A* gene, including the full coding region of exon 26, located ~180,000 base pairs  
149 downstream of the full-length *SCN4A* gene on the same DNA strand (Table 2). Both exon 26  
150 copies are similar in length to each other and to exon 26 of other paralogs, encoding open  
151 reading frames of approximately 390 base pairs without introduced stop codons. Exon 26 is the  
152 3'-terminal exon of the *SCN4A* gene and encodes the TTX-binding P-loop region of DIV.  
153 Hereafter, we refer to the duplicate exons as 26a (more proximal to exon 25) and 26b (more  
154 distal to exon 25) and duplicate P-loop regions as DIVa (more proximal to exon 25) and DIVb  
155 (more distal to exon 25). We also found this duplicated exon in *SCN4A* orthologs within the  
156 genomes of salamanders *P. cinereus*, *P. waltl*, *N. viridescens*, *T. torosa*, and *T. granulosa* and in  
157 published transcriptomes of *Tylototriton wuxianensis* and *Bolitoglossa valleculea*, but not in the  
158 transcriptome of *Hynobius retardatus* or in the genomes of *C. alleganiensis* or the frogs *X.*  
159 *tropicalis* or *N. parkeri*. This pattern suggests that the duplication event likely took place after

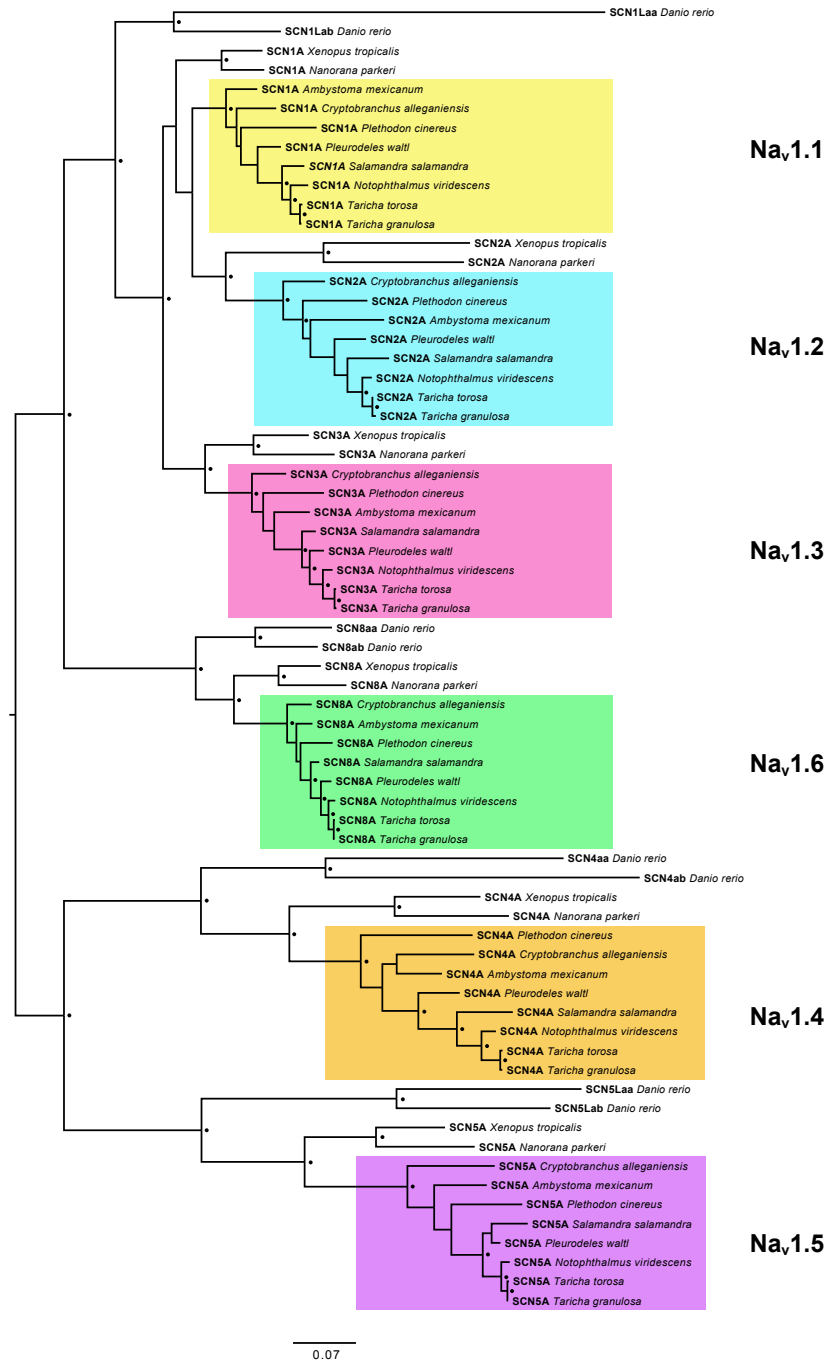

**Figure 1. Evolutionary relationships among salamander voltage-gated sodium channels.** Midpoint rooted maximum likelihood tree constructed from alignment of 2188 amino acids from full coding sequence translations of salamander sodium channel genes, including sequences from two frogs (*Nanorana parkeri* and *Xenopus tropicalis*) and one fish (*Danio rerio*) as outgroups. Black circles indicate nodes with >90% bootstrap support.

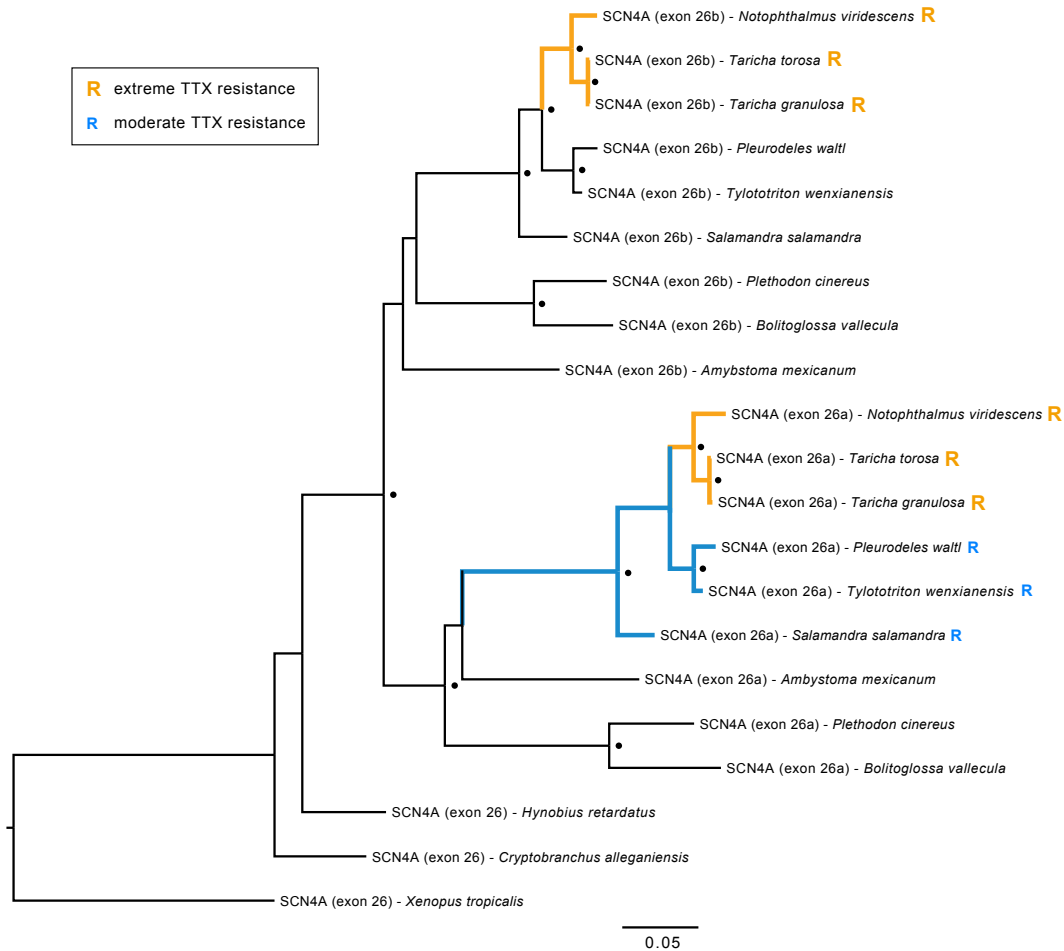

**Figure 2. Ancestral duplication and convergent evolution of TTX resistance in *SCN4A* terminal exon 26.** Maximum likelihood tree constructed from 1050 bp nucleotide alignment of *SCN4A* exon 26 identified in salamander genomes and transcriptomes. “Exon 26a” and “exon 26b” in tip labels refer to the exon copy more proximal and more distal to exon 25, respectively. Black circles indicate node bootstrap support >95%. “R” at tips indicates the presence of substitutions conferring extreme (orange) and moderate (blue) TTX resistance.



160 the split of Cryptobranchoidea and Salamandroidea (Fig. 2). Within the *S. salamandra*  
161 transcriptome, we found four unique RNA sequences transcribed from the *SCN4A* locus, with  
162 alternative splicing of exon 17 and alternative encoding of either exon 26a or 26b. Genome-  
163 mapped reads of multi-tissue transcriptomes of *A. mexicanum* (Bryant et al. 2017; Caballero-  
164 Pérez et al. 2018; Nowoshilow et al. 2018) indicate that these alternative transcripts have similar  
165 expression profiles across various tissues. Taken together, these observations provide evidence  
166 that the duplication of exon 26 led to the creation of functional splice variants in these  
167 salamanders.

168 While numerous nonsynonymous substitutions differentiated the duplicated *SCN4A* exon  
169 26 sequences relative to the original sequences within each genome, we found that identical  
170 substitutions conferring extreme TTX-resistance to toxic newts (Hanifin and Gilly 2015) were  
171 present in both exons from the genomes of all three TTX-bearing newts but not in other, less  
172 toxic salamander species (Fig. 2). Also consistent with the results of Hanifin and Gilly (2015),  
173 we found resistant substitutions conferring moderate TTX resistance in exon 26a of *P. waltl*, *T.*  
174 *wenxianensis*, and *S. salamandra*; however, we observed no resistant substitutions in exon 26b  
175 outside of the toxic newt clade.

176

### 177 **Evolution of TTX resistance in salamanders**

178 We characterized levels of TTX resistance in each  $\text{Na}_v$  paralog as extreme, moderate, and TTX-  
179 sensitive based on previous site-directed mutagenesis experiments in which substitutions were  
180 introduced to TTX-sensitive  $\text{Na}_v$  channels and cross-membrane  $\text{Na}^+$  current was measured *in*  
181 *vitro* in the presence and absence of TTX (Table 3). Our results confirm that *T. granulosa* has six  
182 paralogs with extreme TTX resistance (Table 3, Fig. 3). Our findings are consistent with those  
183 reported by Vaelli et al. (2020) with one exception: we associate DIV (encoded by exon 26)  
184 substitutions A1529G and G1533V with  $\text{Na}_v1.1$  and Q1524E and G1533R with  $\text{Na}_v1.2$  based on  
185 synteny mapping (Fig. S1), gene trees (Figs. 1, S2), and alignments of exon 26 (Fig. S3),  
186 whereas the previous study reversed these assignments. We also show that substitutions with  
187 extreme TTX resistance are present in all six  $\text{Na}_v$  paralogs in two other species of highly toxic  
188 newt, *T. torosa* and *N. viridescens*, indicating that the common ancestor of these three species  
189 possessed extreme TTX resistance. Many of the substitutions in toxic newts parallel those found  
190 in TTX-bearing fish and in snakes that consume tetrodotoxic amphibians (Table 3).

**Table 3. List of TTX resistance-conferring substitutions observed in salamanders.** Listed are all substitutions observed in salamander Na<sub>v</sub> channels that are known to confer TTX resistance. Parallel substitutions in observed in Na<sub>v</sub> channels of TTX-bearing pufferfish and in snakes that consume TTX-bearing prey are also shown. Resistance categories for all substitutions except those in muscle channel Na<sub>v</sub>1.4 (marked with asterisks) are based on fold-change in TTX sensitivity, which was determined by calculating the ratio of IC<sub>50</sub> values (the TTX concentration at which 50% of Na<sub>v</sub> channels are blocked by TTX *in vitro*) of the mutated and wild-type channels. Resistance categorization for Na<sub>v</sub>1.4 substitutions was inferred from Hanifin and Gilly (2015), who measured the direct impact of TTX exposure on the action potentials of salamander muscle fibers. Amino acid sites are in reference to rat Na<sub>v</sub>1.4 (accession number AAA41682).

| Substitution                 | Tetrodotoxic newts                                                | Non-tetrodotoxic salamanders               | Pufferfish and snakes                                                                                         | Fold-change in TTX sensitivity | Resistance category | Citation                                                               |
|------------------------------|-------------------------------------------------------------------|--------------------------------------------|---------------------------------------------------------------------------------------------------------------|--------------------------------|---------------------|------------------------------------------------------------------------|
| Y401C (DI)                   | Na <sub>v</sub> 1.1<br>Na <sub>v</sub> 1.2                        | Na <sub>v</sub> 1.5                        | Pufferfish:<br>Na <sub>v</sub> 1.4a<br>Na <sub>v</sub> 1.5La<br>Na <sub>v</sub> 1.5Lb                         | ~2500×                         | Extreme             | Jost et al. (2008); Venkatesh et al. (2005)                            |
| Y401A (DI)                   | Na <sub>v</sub> 1.1<br>Na <sub>v</sub> 1.3<br>Na <sub>v</sub> 1.6 | Na <sub>v</sub> 1.1                        | Pufferfish:<br>Na <sub>v</sub> 1.1La<br>Na <sub>v</sub> 1.6b                                                  | >600×                          | Extreme             | Jost et al. (2008); Vaelli et al. (2020)                               |
| Y401S (DI)                   | Na <sub>v</sub> 1.5                                               | Na <sub>v</sub> 1.5                        | -                                                                                                             | ~7000×                         | Extreme             | Leffler et al. (2005)                                                  |
| D1532S (DIV)<br>G1533D (DIV) | Na <sub>v</sub> 1.4                                               |                                            | Snake:<br>Na <sub>v</sub> 1.4                                                                                 | -                              | Extreme*            | Feldman et al. (2012); Hanifin and Gilly (2015)                        |
| E758D (DII)                  | -                                                                 | Na <sub>v</sub> 1.5                        | Pufferfish:<br>Na <sub>v</sub> 1.4b                                                                           | ~3000×                         | Extreme             | Bricelj et al. (2005)                                                  |
| M1240T (DIII)                | Na <sub>v</sub> 1.1<br>Na <sub>v</sub> 1.4                        | Na <sub>v</sub> 1.1<br>Na <sub>v</sub> 1.5 | Pufferfish:<br>Na <sub>v</sub> 1.1La<br>Na <sub>v</sub> 1.1Lb<br>Na <sub>v</sub> 1.4a<br>Na <sub>v</sub> 1.4b | ~15×                           | Moderate            | Jost et al. (2008)                                                     |
| V1233I (DIII)                | Na <sub>v</sub> 1.6                                               | Na <sub>v</sub> 1.6                        | Snake:<br>Na <sub>v</sub> 1.6                                                                                 | ~2×                            | Moderate            | McGlothlin et al. (2014); Vaelli et al. (2020)                         |
| I1525V (DIV)                 | Na <sub>v</sub> 1.6                                               | Na <sub>v</sub> 1.5<br>Na <sub>v</sub> 1.6 | Snake:<br>Na <sub>v</sub> 1.6                                                                                 | ~2×                            | Moderate            | Geffeney et al. (2005); McGlothlin et al. (2014); Vaelli et al. (2020) |
| I1525S (DIV)                 | Na <sub>v</sub> 1.4                                               | Na <sub>v</sub> 1.4                        |                                                                                                               | -                              | Moderate*           | Hanifin and Gilly (2015)                                               |
| I1525T (DIV)                 | -                                                                 | Na <sub>v</sub> 1.4<br>Na <sub>v</sub> 1.5 |                                                                                                               | ~7.7×                          | Moderate            | Du et al. (2009)                                                       |

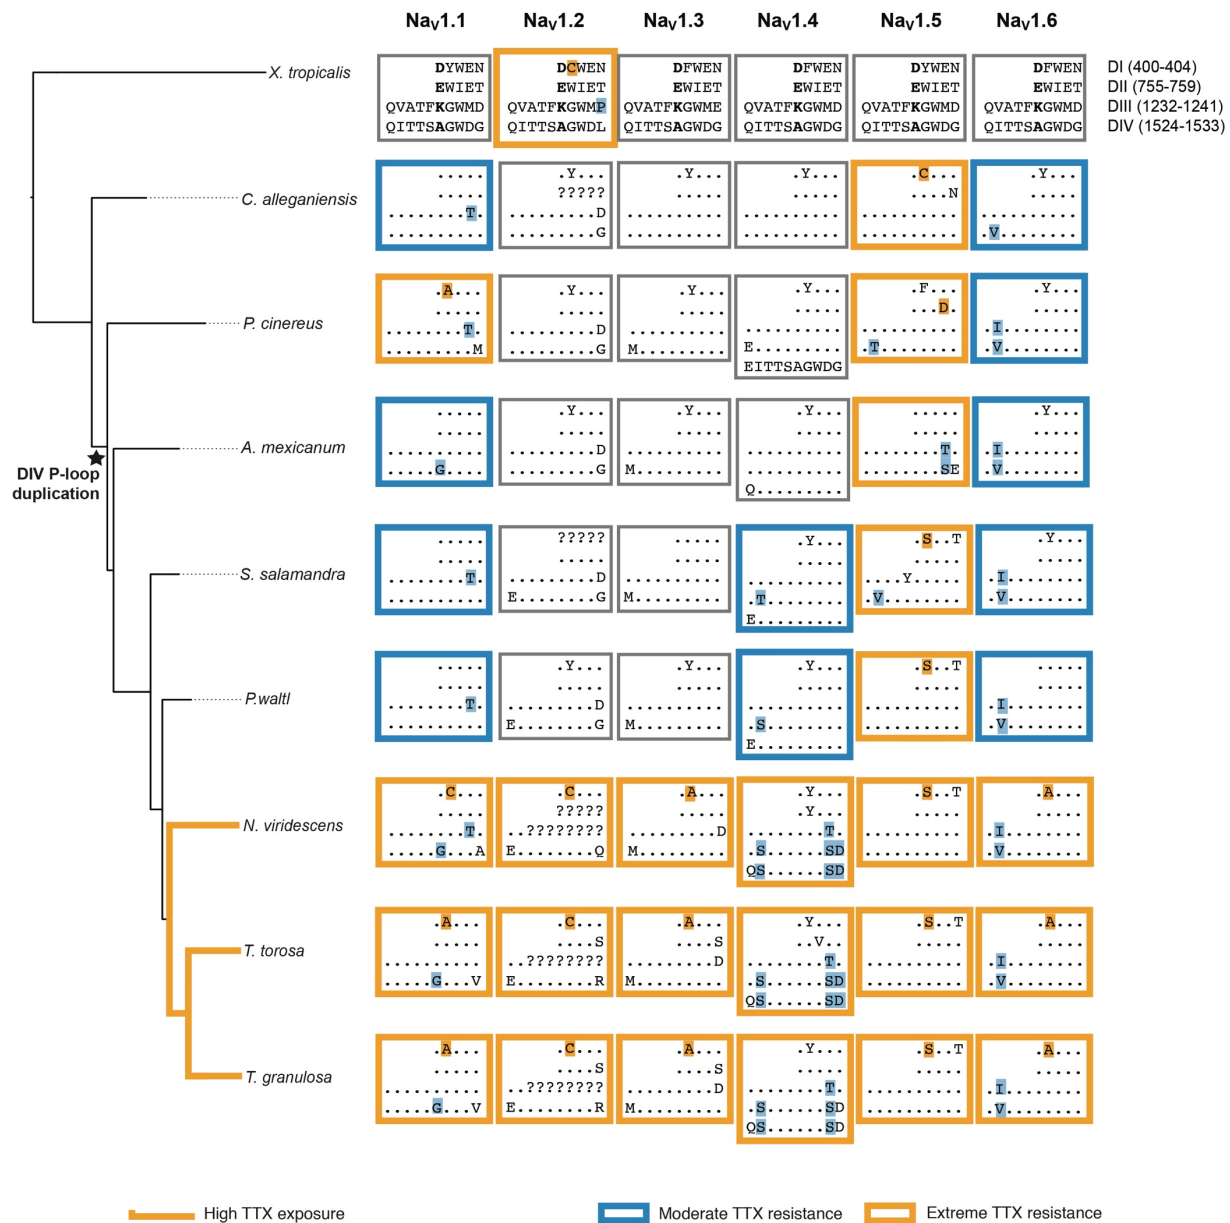

**Figure 3. Distribution of TTX-resistance conferring substitutions in salamander voltage-gated sodium channels.** Toxic newt species are indicated with orange branches (“High TTX exposure”). Amino acids associated with Na<sup>+</sup> selectivity (400D, 755E, 1237K, 1529A) are shown in bold. Dots indicate identity with consensus sequences. Blue boxes indicate paralogs inferred to have moderate (~2-15-fold) resistance, orange boxes indicate paralogs with extreme (>300-fold) resistance, and grey boxes indicate paralogs without resistance or with insufficient sequence data. Substitutions known to confer TTX resistance are highlighted with respective colors. Extreme resistance in a paralog can result from the presence of one highly resistant substitution or the combination of multiple moderately resistant substitutions. Exon duplication has led to an additional TTX-binding domain (DIVb) in Na<sub>v</sub>1.4 of all salamanders except *C. alleganiensis*. We did not identify the sequence encoding DIII of SCN2A for any of the newts, however Vaelli et al. (2020) report that, in *T. granulosa*, this domain is identical in amino acid sequence to other salamanders. Amino acid sites are in reference to rat Na<sub>v</sub>1.4 (accession number AAA41682).

191 No salamander species outside the clade of highly toxic newts possessed a full  
192 complement of TTX-resistant  $\text{Na}_v$  paralogs, indicating the evolution of full physiological  
193 resistance coincided with the origin of extreme toxicity. However, we found at least three  
194 paralogs with moderate or extreme TTX resistance in all salamander species we examined,  
195 indicating that the evolution of TTX resistance in newts built upon more ancient changes that  
196 first appeared in their non-newt relatives. Substitutions conferring moderate or extreme  
197 resistance were observed within the heart channel  $\text{Na}_v1.5$  and brain/nerve channels  $\text{Na}_v1.1$  and  
198  $\text{Na}_v1.6$  of all salamander species, with additional resistance-conferring substitutions evolving  
199 within TTX-bearing newts. As first shown by Hanifin and Gilly (2015), moderate resistance was  
200 present in the skeletal muscle channel  $\text{Na}_v1.4$  of *S. salamandra* and *P. waltl*, but not in the three  
201 other salamander species we examined. Although our outgroup, the frog *X. tropicalis*, also  
202 contained a highly resistant substitution in  $\text{Na}_v1.2$ , we found no evidence for resistance in this  
203 paralog in any salamanders outside of tetrodotoxic newts.

204 Based on our ancestral sequence reconstructions, the most recent common ancestor of all  
205 salamanders had three TTX resistant sodium channels:  $\text{Na}_v1.1$  (brain, moderately resistant),  
206  $\text{Na}_v1.5$  (heart, highly resistant), and  $\text{Na}_v1.6$  (brain/peripheral nerves, moderately resistant; Fig.  
207 3). Moderate resistance in the muscle channel  $\text{Na}_v1.4$  appeared between 75–130 mya, after the  
208 divergence of Ambystomatidae and Salamandridae (the family consisting of true salamanders  
209 and newts; Hanifin and Gilly 2015). This gain in muscle resistance coincided with the  
210 appearance of two highly resistant substitutions in DI of  $\text{Na}_v1.5$ , which are present in all  
211 Salamandridae. Extreme TTX resistance across all *SCNA* paralogs evolved more recently,  
212 occurring approximately 37–50 mya, after the split between primitive newts – which include  
213 *Pleurodeles* – and modern newts, which include all TTX-bearing species. Over this time period,  
214 TTX resistance evolved in  $\text{Na}_v1.2$  and  $\text{Na}_v1.3$ , and multiple additional resistant mutations  
215 appeared and became fixed in  $\text{Na}_v1.1$ ,  $\text{Na}_v1.4$ , and  $\text{Na}_v1.6$ .

216

### 217 **Selective regimes and evolutionary rates**

218 In order to characterize the selective regimes acting on *SCNA* genes, we used the codeml  
219 program in PAML (Yang 2007) to fit models of selection to *SCNA* codon alignments and  
220 compared nested models using likelihood ratio tests (LRTs). We tested for site-specific positive  
221 selection within all amphibians by comparing two sets of nested models: one set using a discrete

222 distribution of  $\omega$  values either with or without positive selection (M1a vs. M2a; Yang et al.  
223 2005); and another set fitting a continuous distribution of  $\omega$  values under purifying selection  
224 only, or adding categories of unconstrained evolution and positive selection (M7 vs. M8 and  
225 M8a vs. M8; Yang et al. 2000). Parameter estimates and LRT results for site models are  
226 summarized in Table S3. To test for selection within toxic newts, we fit branch (Yang 1998) and  
227 branch-site models (Zhang et al. 2005) to our datasets, which allowed  $\omega$  to vary both among  
228 codon sites and between toxic newts and other amphibians (summarized in Table S4).

229 All models estimated relatively low ratios of nonsynonymous to synonymous substitution  
230 ( $d_N/d_S$ , or  $\omega$  ratios) for all  $Na_v$  paralogs (average  $\omega$  ratios from branch models ranged from 0.05  
231 to 0.25), indicating pervasive purifying selection. Based on LRTs comparing one  $\omega$ -value models  
232 (which allow only for one  $\omega$  value across the entire phylogeny) to branch models (allowing for a  
233 different  $\omega$  ratio in the toxic newt clade relative to other amphibians), we found that  $\omega$  ratios  
234 were significantly higher in toxic newts for  $Na_v1.1$ ,  $Na_v1.3$ , and  $Na_v1.4$ , borderline significant for  
235  $Na_v1.6$ , and non-significant for  $Na_v1.2$  and  $Na_v1.5$  (Fig. 4A; Table S4). The largest difference in  
236  $\omega$  ratios in the branch test was observed for the muscle channel  $Na_v1.4$  (newt  $\omega = 0.25$ ; all  
237 salamanders  $\omega = 0.10$ ), which appears to be due to both an increase in the proportion of  
238 unconstrained sites as well as a larger number of estimated sites undergoing positive selection  
239 (Fig. 4B). However, the posterior probability support for positive selection at many of these sites  
240 was low, and LRTs from branch-site models indicated significant evidence for a shift in positive  
241 selection only in paralog  $Na_v1.3$  (Tables S3, S4).

242 Our site and branch-site models identified a number of TTX-binding sites with elevated  
243  $\omega$  ratios (Table 4; Tables S5, S6). Because of the small number of species in our study, we had  
244 low power to detect statistically significant positive selection (Anisimova et al. 2001;  
245 Kosakovsky Pond and Frost 2005; Yang et al. 2000), and the posterior probabilities provided  
246 low-to-moderate support for positive selection at most sites. We also note that the false positive  
247 rates of site selection models can be inflated due to gene conversion events (Casola and Hahn  
248 2009), among-site variation in  $d_S$  (Kosakovsky Pond and Frost 2005), and multinucleotide  
249 mutations (Venkat et al. 2018). However, results were consistent between the M2a and M8  
250 models, and the codons that were identified suggest that positive selection may have been  
251 important for observed substitutions in TTX-binding regions.

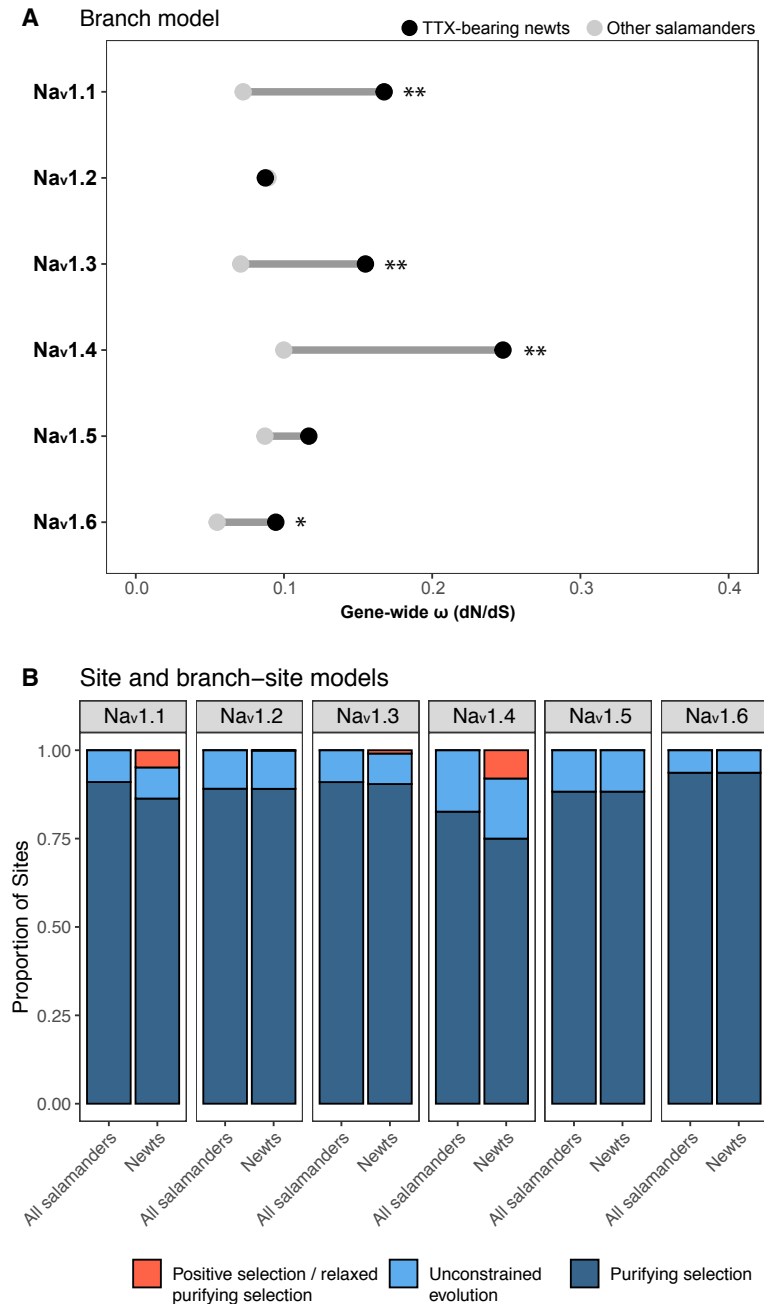

**Figure 4. Tests for shifts in selective pressure on salamander voltage-gated sodium channels.**

(A) PAML branch models comparing estimates of gene-wide  $\omega$  (dN/dS) within TTX-bearing newts (black circles) and other salamanders (grey circles). Significant differences based on likelihood ratio tests are indicated with \* ( $p < 0.05$ ) and \*\* ( $p < 0.01$ ). (B) PAML site and branch-site model estimates of proportions of sites under purifying selection ( $0 < \omega < 0.05$  in both lineages), unconstrained evolution ( $\omega = 1$  in both lineages), and positive selection or relaxed purifying selection ( $0 < \omega < 0.05$  in salamanders and  $\omega \geq 1$  in TTX-bearing newts). Although likelihood-ratio tests were non-significant for Nav1.1 and Nav1.4 (Tables S3, S4), PAML identified a large proportion of amino acid coding sites within these paralogs with elevated dN/dS ratios in toxic newts.

**Table 4. P-loop sites with elevated  $\omega$  values in all salamanders and in toxic newts.** Sites were detected as putatively affected by positively selection within salamanders and within toxic newts using the empirical Bayes method based on site models and branch-site models respectively. Because we had low power to detect positive selection at specific sites due to the small number of species in our study, these results should be interpreted with caution. Included are all P-loop sites identified as putatively positively selected with posterior probability > 0.50. Sites with posterior probability > 0.95 are indicated with asterisks, but we note that the likelihood ration test for the Nav1.4 branch-site model was non-significant. Bolded sites have non-conservative amino acid substitutions associated with TTX resistance in toxic newts.

|                                                                 | Nav1.1                                     | Nav1.2              | Nav1.3            | Nav1.4                                                                                   | Nav1.5    | Nav1.6            |
|-----------------------------------------------------------------|--------------------------------------------|---------------------|-------------------|------------------------------------------------------------------------------------------|-----------|-------------------|
| <b>Tissue expression</b>                                        | Brain                                      | Brain               | Brain             | Muscle                                                                                   | Heart     | Brain / PNS       |
| <b>P-loop sites under positive selection in all salamanders</b> | <b>Y401A/C (DI)</b><br><b>G1533V (DIV)</b> | <b>G1533R (DIV)</b> | <b>Y401A (DI)</b> | -                                                                                        | 739 (DII) | <b>Y401A (DI)</b> |
| <b>P-loop sites under positive selection in toxic newts</b>     | 1224 (DIII)<br><b>A1529G (DIV)</b>         | -                   | T759S (DII)       | W756Y (DII)*<br><b>M1240T (DIII)</b><br>1517 (DIV)<br>1519 (DIV)<br><b>D1532S (DIV)*</b> | -         | -                 |

252            Within the brain channels Nav1.1, Nav1.3, and Nav1.6, putative positive selection was  
253 detected by site models at site 401 within the DI P-loop, indicating selection acting across all  
254 salamanders rather than specifically within toxic newts (Table 4). Replacement of the aromatic  
255 amino acid at site 401 with a non-aromatic amino acid can substantially impact TTX binding  
256 capacity (Leffler et al. 2005; Vaelli et al. 2020; Venkatesh et al. 2005), and we observed non-  
257 aromatic substitutions at this site within all brain channels of highly toxic newts (Fig. 3, Table 3).  
258 The codon sequence for site 401 was variable across many salamanders lacking TTX; however,  
259 almost all of the nonsynonymous changes observed outside of TTX-bearing newts were  
260 biochemically conservative (both phenylalanine and tyrosine are aromatic and do not affect TTX  
261 binding; Sunami et al. 2000), with the exception of the 401A observed in *P. cinereus* Nav1.1.  
262 This conservative variation likely contributes to the signal of diversifying selection acting on this  
263 codon in less toxic salamander lineages. Site models also suggested positive selection acting on  
264 site 1533 in DIV of Nav1.1 and Nav1.2 (Table 4). Although the substitutions present at site 1533  
265 in these newt paralogs have not been tested experimentally for their effects on TTX binding,

266 Maruta et al. (2008) showed that a G1533T substitution at this site led to a moderate (~2-3-fold)  
267 decrease in TTX binding affinity, and substitutions at this site are common in TTX-resistant  
268 channels (Feldman et al. 2012; Geffeney et al. 2005; Jost et al. 2008; McGlothlin et al. 2016),  
269 suggesting that these non-synonymous changes likely also reduce TTX binding affinity in newts.

270 Within the toxic newt lineage, we identified putative positive selection acting on three  
271 known TTX-binding sites: 1240 and 1532 in DIII and DIV of muscle channel  $Na_v1.4$  and 1529  
272 in DIV of brain channel  $Na_v1.1$  (Table 4). In  $Na_v1.4$ , sites 1240 and 1532 contain resistance-  
273 conferring substitutions exclusively within toxic newts and these substitutions have been  
274 associated with extreme TTX resistance in *Taricha* muscle fibers (Hanifin and Gilly 2015). In  
275  $Na_v1.1$ , site 1529 encodes part of the  $Na^+$  selectivity filter (comprised of interacting amino acids  
276 DEKA – sites 400, 755, 1237, and 1529), which is highly conserved across  $Na_v$  paralogs. An  
277 A1529G substitution (resulting in a DEKG filter) is present in  $Na_v1.1$  of *A. mexicanum* and all  
278 members of the toxic newt clade. While this substitution does not appear to affect  $Na^+$  selectivity  
279 or to be sufficient in preventing TTX from binding (Jost et al. 2008), it can alter channel firing  
280 properties, producing substantially higher  $Na^+$  currents in comparison to the DEKA filter (Jost et  
281 al. 2008). The same alanine to glycine substitution has been observed in  $Na_v$  channels of TTX-  
282 bearing flatworms (Jeziorski et al. 1997) and pufferfish (Jost et al. 2008), which suggests that it  
283 may play a role in TTX resistance in these organisms.

284 Outside of TTX-binding regions, we found evidence for putative positive selection in  
285 similar regions across multiple *SCNA* paralogs (Tables S5, S6). For  $Na_v1.4$ , the majority of sites  
286 under positive selection reside in terminal exon 26a that encodes the DIVa P-loop (exon 26b was  
287 excluded from this analysis due to its absence in some species). For most other paralogs, the  
288 largest clusters of sites with elevated  $d_N/d_S$  ratios occurred within the DI L5 turret (the  
289 extracellular loop upstream of the DI P-loop, encoded by exons 6 and 7) and/or within the DIII  
290 L5 turret upstream of the DIII P-loop encoded by exon 21. These sites may facilitate interaction  
291 with other proteins, or alternatively, some of these sites identified by the branch-site model may  
292 be selected to compensate for biochemical changes produced by TTX-resistant mutations.

293

## 294 **Gene conversion events**

295 We also tested for evidence of nonallelic gene conversion as a mechanism of sequence evolution  
296 contributing to adaptive evolution in *SCNAs* using the program GENECONV. Nonallelic or



297 ectopic gene conversion results from an interlocus exchange of DNA that can occur between  
298 closely related sequences during double-stranded break repair (Hansen et al. 2000).  
299 GENECONV uses the information in a multiple sequence alignment to identify regions of  
300 similarity shared between two sequences that is higher than expected by chance based on  
301 comparisons to permuted alignments (Sawyer 1999). We selected this program to detect gene  
302 conversion because of its low false positive rates and robustness to shifts in selective pressure  
303 (Bay and Bielawski 2011; Posada and Crandall 2001). Because nonallelic gene conversion is  
304 more likely to occur between paralogs residing on the same chromosome (Benovoy and Drouin  
305 2009; Drouin 2002; Semple and Wolfe 1999), we limited our search to events between the  
306 tandem duplicates *SCN1A*, *SCN2A*, and *SCN3A* and between exons 26a and 26b of *SCN4A*  
307 within each salamander genome. While few gene conversion events were detected within each  
308 species by GENECONV, all of the regions that were detected within *Taricha* newts contain  
309 TTX-binding sites with substitutions associated with TTX resistance, including the DIVa and  
310 DIVb P-loops of *SCN4A* (Fig. 5; Table 5). We observed three TTX resistant amino acids  
311 (I1525S, D1532S, G1533D) within the DIVa and DIVb P-loops of *SCN4A* in toxic newt  
312 genomes. In contrast, *P. waltl*, a closely related but non-tetrodotoxic newt, contains one  
313 moderately TTX-resistant amino acid (I1525S) in the DIVa P-loop and no resistant amino acids  
314 in the DIVb P-loop (Fig. 5A). These differences involve four identical nucleotide changes at  
315 homologous sites in both exon duplicates. Our short reads from the genomes of *N. viridescens*  
316 and *Taricha* newts mapped onto each of these exon assemblies across putative recombination  
317 break points with high (> 50-fold) coverage, lending support for sequence convergence rather  
318 than an assembly error. We did not detect gene conversion between these exons within the  
319 genomes of *T. granulosa* or *N. viridescens*; however, this may be due to the low power of  
320 GENECONV to detect conversion (Bay and Bielawski 2011), particularly in the presence of low  
321 sequence diversity and when the conversion tract is shorter than ~100 bp (McGrath et al. 2009;  
322 Posada and Crandall 2001). Together, these results suggest that the three resistant amino acids  
323 accumulated together in one exon copy followed by conversion of the other exon ~40 mya in a  
324 toxic newt ancestor.

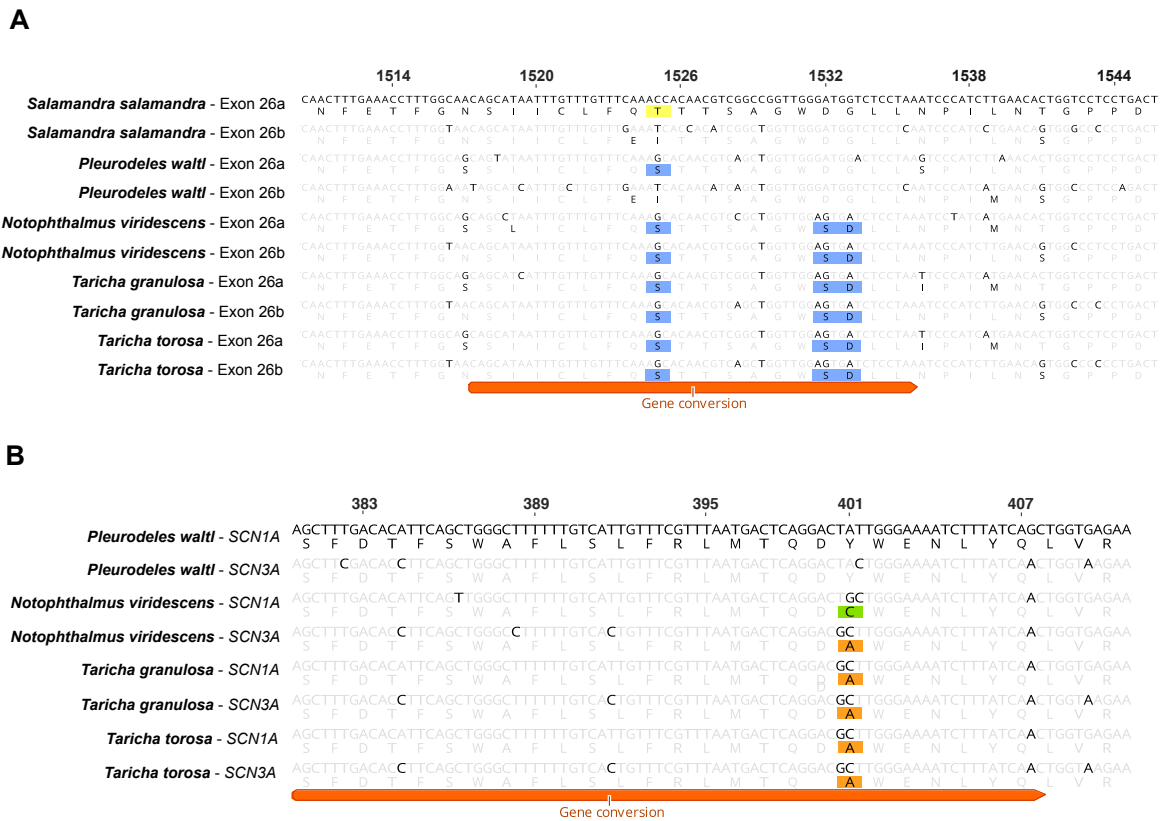

**Figure 5. Gene conversion within TTX binding regions.** (A) Gene conversion was detected between DIVa and DIVb P-loops within duplicate exons 26a and 26b of *SCN4A* in *T. torosa*. Substitutions conferring TTX resistance are highlighted in yellow and blue. While one moderately resistant substitution is present in DIVa of less toxic salamanders (1525T/S), three identical substitutions are present in both DIVa and DIVb of highly toxic newts. (B) Gene conversion was also detected between the DI P-loops of paralogs *SCN1A* and *SCN3A* in both *T. torosa* and *T. granulosa*. In *Notophthalmus*, both paralogs have different resistant substitutions (401C in *SCN1A* – highlighted in green; 401A in *SCN3A* – highlighted in orange). This putative gene conversion may have homogenized TTX-resistant substitutions among these paralogs within *Taricha* newts. Site numbers are in reference to amino acids of rat  $Na_v1.4$  (accession number AAA41682).

325 We also detected gene conversion between the DI P-loops of paralogs *SCN1A* and  
326 *SCN3A* within the genomes of both *Taricha* species (Fig. 5B, Table 5). TTX-resistant  
327 substitutions are identical in the DI P-loops of *SCN1A* and *SCN3A* in both *Taricha* species  
328 (401A, encoded by a GCT codon), while *SCN1A* of *N. viridescens* contains a different codon at  
329 this position (TGC, encoding 401C), consistent with gene conversion occurring at this locus in  
330 *Taricha*. Both *SCN1A* and *SCN3A* of non-tetrodotoxic *P. waltl* newts encode a TTX-sensitive  
331 tyrosine at this locus. It is unclear whether putative gene conversion event(s) occurred before or  
332 after resistance evolved in both paralogs. Gene conversion may have converted a non-resistant  
333 channel to a resistant channel in an ancestral *Taricha*, while *N. viridescens* independently  
334 acquired a Y401A substitution, or it may have homogenized substitutions within two channels  
335 that had previously evolved resistance in an ancestor of all toxic newts. In *Taricha* newts, the  
336 transition from either tyrosine or cysteine to alanine required multiple nucleotide substitutions in  
337 both paralogs, making gene conversion a likely explanation for the observed substitution  
338 patterns.

339 We detected additional gene conversion events that may have involved a non-resistant  
340 paralog acting as a donor to a resistant paralog, leading to the loss of TTX resistance in *A.*  
341 *mexicanum* and *C. alleganiensis* paralogs. A resistant substitution is present in the DIII P-loop of  
342 *SCN1A* in most salamanders but is absent in *SCN1A* of *A. mexicanum* (Fig. 3), and we detected  
343 gene conversion in an adjacent region between *SCN1A* and the non-resistant *SCN2A* paralog  
344 within the *A. mexicanum* genome (Table 5). Similarly, *C. alleganiensis* *SCN2A* contains a non-  
345 resistant 1533G within DIV of all six paralogs, while *SCN2A* of *X. tropicalis* frogs encodes a  
346 putatively TTX-resistant 1533L, and gene conversion between paralogs *SCN2A* and *SCN3A* may  
347 have facilitated the loss of this substitution in salamanders

**Table 5. Gene conversion events between adjacent salamander voltage-gated sodium channel paralogs detected with GENECONV.** Bolded rows indicate putative gene conversion events associated with the gain (\*) or loss (†) of TTX resistance substitutions within a lineage. Global Bonferroni-corrected (BC) p-values from 10,000 simulations are reported. Protein begin and end sites reference the rat Na<sub>v</sub>1.4 channel (accession number AAA41682). Total poly – polymorphism within the converted region across all species; num diffs – pairwise differences between the two paralogs within the converted region; total diffs – total pairwise differences across the entire length of the two paralogs.

**SCN1A–SCN2A–SCN3A coding sequences**

| Species                 | Gene 1 – Gene 2       | BC p-value    | Protein begin | Protein end | P-loop      | Exon                  | Length (bp) | Total poly (bp) | Num diffs (bp) | Total diffs (bp) |
|-------------------------|-----------------------|---------------|---------------|-------------|-------------|-----------------------|-------------|-----------------|----------------|------------------|
| <i>A. mexicanum</i>     | SCN1A - SCN2A         | 0.01          | 12            | 42          | -           | 1                     | 93          | 48              | 5              | 794              |
|                         | SCN1A - SCN3A         | 0.01          | 45            | 84          | -           | 1                     | 128         | 54              | 5              | 722              |
|                         | SCN2A - SCN3A         | 0.00          | 203           | 405         | DI          | 5; 6; 7; 8<br>19; 20; | >626        | 74              | 2              | 902              |
|                         | SCN1A - SCN2A         | 0.00          | 1059          | 1193        | -           | 21                    | >407        | 134             | 25             | 794              |
|                         | SCN1A - SCN3A         | 0.02          | 1104          | 1144        | -           | 20                    | 127         | 37              | 1              | 722              |
|                         | <b>SCN1A - SCN2A†</b> | <b>0.02</b>   | <b>1208</b>   | <b>1232</b> | <b>DIII</b> | <b>21</b>             | <b>84</b>   | <b>35</b>       | <b>2</b>       | <b>794</b>       |
| <i>C. alleganiensis</i> | SCN1A - SCN2A         | 0.00          | 1111          | 1232        | DIII        | 20;21                 | >376        | 153             | 23             | 621              |
|                         | <b>SCN2A - SCN3A†</b> | <b>0.02</b>   | <b>1478</b>   | <b>1611</b> | <b>DIV</b>  | <b>26</b>             | <b>406</b>  | <b>164</b>      | <b>32</b>      | <b>693</b>       |
|                         | SCN1A - SCN2A         | 0.00          | 1531          | 1652        | DIV         | 26                    | 371         | 177             | 27             | 621              |
| <i>N. viridescens</i>   | SCN1A - SCN3A         | 0.00          | 500           | 512         | -           | 10                    | 89          | 41              | 1              | 733              |
|                         | SCN1A - SCN2A         | 0.01          | 1104          | 1199        | -           | 16                    | 292         | 109             | 20             | 796              |
| <i>P. cinereus</i>      | SCN1A - SCN2A         | 0.00          | 12            | 32          | -           | 1                     | 64          | 31              | 0              | 838              |
|                         | SCN1A - SCN3A         | 0.00          | 362           | 499         | DI          | 8; 9; 10              | >576        | 88              | 13             | 786              |
|                         | SCN2A - SCN3A         | 0.02          | 573           | 599         | -           | 13                    | 83          | 29              | 2              | 897              |
|                         | SCN1A - SCN3A         | 0.00          | 610           | 667         | -           | 14                    | 177         | 68              | 8              | 786              |
|                         |                       | SCN1A - SCN2A | 0.00          | 1135        | 1305        | DIII                  | 24          | >524            | 138            | 9                |
|                         | SCN1A - SCN3A         | 0.03          | 1430          | 1473        | -           | 26                    | 134         | 46              | 5              | 786              |
| <i>P. waltl</i>         | SCN1A - SCN3A         | 0.03          | 1369          | 1386        | -           | 25                    | 56          | 30              | 0              | 738              |
| <i>T. granulosa</i>     | <b>SCN1A - SCN3A*</b> | <b>0.01</b>   | <b>374</b>    | <b>408</b>  | <b>DI</b>   | <b>8</b>              | <b>105</b>  | <b>41</b>       | <b>2</b>       | <b>725</b>       |
| <i>T. torosa</i>        | <b>SCN1A - SCN3A*</b> | <b>0.01</b>   | <b>374</b>    | <b>408</b>  | <b>DI</b>   | <b>8</b>              | <b>105</b>  | <b>41</b>       | <b>2</b>       | <b>725</b>       |

**SCN4A exon 26**

| Species            | Gene          | BC p-value  | Protein begin | Protein end | P-loop     | Exon           | Length (bp) | Total poly (bp) | Num diffs (bp) | Total diffs (bp) |
|--------------------|---------------|-------------|---------------|-------------|------------|----------------|-------------|-----------------|----------------|------------------|
| <i>P. cinereus</i> | SCN4A         | 0.01        | 1509          | 1534        | DIV        | 26a-26b        | 77          | 26              | 0              | 154              |
| <i>T. torosa</i>   | <b>SCN4A*</b> | <b>0.02</b> | <b>1518</b>   | <b>1536</b> | <b>DIV</b> | <b>26a-26b</b> | <b>56</b>   | <b>22</b>       | <b>1</b>       | <b>178</b>       |

## 348 Discussion

349 Here we show that TTX-bearing newts have evolved resistance to their own toxicity through  
350 multiple parallel changes in their *SCNA* genes and that, similar to snakes that consume TTX-  
351 containing prey (McGlothlin et al. 2016; Perry et al. 2018), some of the resistance in this taxon is  
352 ancient, first appearing in an early salamander. However, while substitutions conferring  
353 moderate TTX resistance are present in some non-toxic salamander genomes, only the TTX-  
354 bearing newts have substitutions conferring high resistance across all six of their *SCNA* paralogs,  
355 and several of these channels harbor multiple resistant substitutions in more than one domain.  
356 Many of the substitutions conferring resistance to toxic newts are also present in *SCNA* paralogs  
357 of TTX-resistant pufferfish (Jost et al. 2008) and snakes (McGlothlin et al. 2016). Similar to  
358 pufferfish, newts appear to require resistance within all of their brain/nerve channels in addition  
359 to their hearts and muscles. This feature apparently distinguishes toxic prey from their predators,  
360 whose brain channels lack resistant substitutions (McGlothlin et al. 2014). This molecular  
361 parallelism emphasizes the strong structural and functional constraints on this gene family,  
362 which appear to limit the evolution of TTX resistance to a small number of predictable pathways,  
363 leading to convergent and parallel changes across multiple taxa (Feldman et al. 2012). We show  
364 that the evolution of extreme TTX resistance is accompanied by a shift in signatures of selection  
365 in four out of six paralogs, with suggestive evidence of positive selection acting directly on TTX-  
366 binding sites. Finally, the evolution of physiological resistance appears to have been facilitated  
367 by at least two instances of non-allelic gene conversion, which acted to introduce TTX-resistance  
368 substitutions from one paralog (or exon duplicate) to another.

369 Our reconstruction of the history of TTX resistance in salamanders reveals the ancient  
370 origins of moderate resistance in nerve channels  $\text{Na}_v1.1$  and  $\text{Na}_v1.6$  and high resistance in the  
371 heart channel  $\text{Na}_v1.5$ , which arose ~160 mya. Resistant substitutions in the muscle channel  
372  $\text{Na}_v1.4$  evolved later, becoming fixed in the clade including all newts and *S. salamandra* between  
373 75–130 mya. This was followed by the accumulation of additional substitutions in DIII, DIVa,  
374 and DIVb of  $\text{Na}_v1.4$  within members of the highly toxic newt clade, providing their muscles with  
375 resistance to much higher concentrations of TTX relative to salamanders lacking these mutations  
376 (Hanifin and Gilly 2015). Substitutions in DI conferring extreme TTX resistance to the  
377 brain/nerve channels  $\text{Na}_v1.1$ ,  $\text{Na}_v1.2$ ,  $\text{Na}_v1.3$ , and  $\text{Na}_v1.6$  also evolved more recently (~37–50  
378 mya) and they are limited to the toxic newt clade with only one exception,  $\text{Na}_v1.1$  of *P. cinereus*,

379 which may have arisen independently in this lineage. Toxic newts also have unique substitutions  
380 in DIV of  $Na_v1.1$  and  $Na_v1.2$ , which may provide additional resistance to their brain channels or  
381 may compensate for structural or functional changes resulting from resistant substitutions in DI  
382 or in other regions of the protein. The widespread presence of TTX in modern newts suggests  
383 that possession of TTX evolved in the common ancestor this clade (Hanifin 2010). This is  
384 supported by our observation of shared TTX-resistance substitutions across all *SCNA* paralogs in  
385 highly toxic newts. However, the highly toxic newts included in this study are limited to North  
386 American species and do not include Asian or European newts (e.g. *Cynops* and *Triturus* spp.)  
387 known to have TTX (Hanifin 2010). Sequencing the *SCNAs* of these species will reveal if  
388 extreme resistance in the nerve channels is specific to North American newts or arose earlier in  
389 an ancestral newt species.

390         Whether the TTX-resistance substitutions observed in newt relatives are adaptive and  
391 what selective pressures act to retain them remains to be determined. In ancestral salamandrids,  
392 resistance in three or four of the six *SCNAs* may have provided tolerance to low levels of TTX,  
393 facilitating the evolution of extreme toxicity in the modern newts, although it is unclear whether  
394 these substitutions arose in response to TTX exposure or as a side effect of selection for another  
395 aspect of channel function. Environmental exposure to TTX could potentially occur from TTX-  
396 bearing prey, such as terrestrial *Bipalium* flatworms (Stokes et al. 2014) or from TTX-producing  
397 bacteria (Vaelli et al. 2020). In a feeding study on *B. adventitium* flatworms, Ducey et al. (1999)  
398 demonstrated that while all salamanders rejected the flatworms when they were first presented,  
399 some habituated *Ambystoma* and *Plethodon* individuals were able to consume them with only  
400 minor symptoms of TTX poisoning, including apparent mucus production and numbing of the  
401 mouth. Although the amount of TTX present in the worms was not measured, this observation  
402 supports the conjecture that these substitutions play a protective role against consuming toxic  
403 prey.

404         Our power to detect sites undergoing positive selection was low due to the small number  
405 of species available for our analyses and the high sequence conservation among orthologs  
406 (Anisimova et al. 2001; Yang et al. 2000). However, our analyses provided evidence consistent  
407 with positive selection acting on TTX-binding sites, including sites implicated in the extreme  
408 TTX resistance of salamander muscle fibers. Our branch models indicate that several  $Na_v$   
409 paralogs have higher  $\omega$  ratios within the tetrodotoxic newt clade relative to other salamanders.

410 This increase in  $\omega$  ratio appears to be mainly the result of relaxed purifying selection rather than  
411 positive selection, as few sites were estimated to have  $\omega > 1$  by branch-site models. Muscle  
412 channel  $\text{Na}_v1.4$  had the highest  $\omega$  ratio in toxic newts, coinciding with a relatively high  
413 proportion ( $\sim 0.06$ ) of sites detected as undergoing positive selection in toxic newts and purifying  
414 selection in other salamanders, although the likelihood ratio test was non-significant (Table S4).  
415 This pattern may derive from ongoing positive selection on *SCN4A* resulting from the  
416 coevolutionary arms race between newts and snakes. Increased  $\omega$  ratios in toxic newts coincide  
417 with the appearance of highly TTX-resistant substitutions within the DI P-loops of  $\text{Na}_v1.1$ ,  
418  $\text{Na}_v1.3$ , and  $\text{Na}_v1.6$ , DIV of  $\text{Na}_v1.1$ , and the DIII, DIVa, and DIVb P-loops in  $\text{Na}_v1.4$ . While the  
419 pattern of these substitutions suggests that they are adaptive changes that occurred specifically  
420 within the tetrodotoxic newt clade, our branch-site models detected positive selection on TTX-  
421 binding sites only within the DIV P-loop of  $\text{Na}_v1.1$  and the DIII and DIVa P-loops of  $\text{Na}_v1.4$ ,  
422 while our site models detected positive selection on site 401 within paralogs  $\text{Na}_v1.1$ ,  $\text{Na}_v1.3$ , and  
423  $\text{Na}_v1.6$  of all salamanders. This may be due to the statistically conservative nature of the branch-  
424 site model and the tendency of PAML to detect ongoing diversifying selection rather than rare  
425 positive selection events (Yang and dos Reis 2010). Furthermore, the site and branch-site models  
426 do not distinguish between biochemically conservative and non-conservative amino acid  
427 changes. Nevertheless, the detection of relatively high  $\omega$  ratios within the toxic newt clade along  
428 with site-specific positive selection at known TTX-binding sites provides strong evidence that  
429 these substitutions are adaptive.

430 In addition to the six *SCNA* paralogs described in amphibians (Zakon 2012), our  
431 sequence data revealed the presence of a partial duplication of the *SCN4A* gene in salamanders  
432 that includes the entirety of exon 26, encoding the DIV P-loop, which likely occurred in an  
433 ancestor of Salamandroidea. The maintained open reading frame and shared expression patterns  
434 of transcripts encoding exons 26a and 26b in *A. mexicanum* tissues suggests that this duplicate  
435 region is functional in salamander muscles. In some insects that feed on toxic plants, the  
436 appearance of resistance-conferring substitutions is accompanied by one or more duplications of  
437 the genes that the toxin targets (Petschenka et al. 2017; Zhen et al. 2012). Petschenka et al.  
438 (2017) show that in at least one species, such gene duplication precedes resistance, and they  
439 suggest that gene duplication may help to alleviate the potential decrease in fitness incurred by  
440 the insects due to the negative pleiotropic effects of toxin-resistant mutations. Similarly,

441 resistance in DIV of salamander *SCN4A* appears after the duplication of this domain, and only  
442 the TTX-bearing newts have resistant substitutions in both exon copies, lending support to this  
443 hypothesis and raising the possibility that the evolution of physiological resistance in  
444 salamanders may have been mediated in part by this genomic novelty.

445 We observed a rare case of the generation of adaptive variants via non-allelic gene  
446 conversion, which occurred both between the duplicated exons of *SCN4A* and between paralogs  
447 *SCN1A* and *SCN3A*. Gene conversion is often thought to play a role in constraint, preserving the  
448 core functions of gene families (Chapman et al. 2006) and reducing deleterious mutation loads  
449 (Khakhlova and Bock 2006; Ohta 1989), and has also been associated with the diversification of  
450 major histocompatibility complex genes in mammals (Go et al. 2003; Kuhner et al. 1991) and the  
451 introduction of deleterious nonsynonymous mutations into different parts of the genome (Casola  
452 et al. 2012; Galtier et al. 2009). However, the potential for gene conversion to facilitate  
453 adaptation is less widely appreciated. Theory suggests that gene duplication and subsequent gene  
454 conversion may allow for movement between adaptive peaks via the accumulation of beneficial  
455 mutations in one gene copy that can be transferred to a favorable genetic background (Hansen et  
456 al. 2000). This process has been implicated in the adaptive evolution of hypoxia tolerance in  
457 high-altitude Tibetan wolves (Signore et al. 2019) and in heavy metal tolerance in *Arabidopsis*  
458 (Hanikenne et al. 2013). Here, we provide evidence that gene conversion contributed to the  
459 spread of TTX-resistant amino acid substitutions. In the brain channel genes *SCN1A* and *SCN3A*,  
460 this likely occurred between two genes that had previously evolved resistance, homogenizing the  
461 substitutions between the two paralogs in *Taricha* newts. In the muscle channel gene *SCN4A*,  
462 three identical amino acids were present within both duplicated DIV TTX-binding domains in  
463 toxic newts, while only one resistant amino acid was present in a single DIV domain in their  
464 non-tetrodotoxic salamander relatives, suggesting that resistant substitutions accumulated in one  
465 exon copy in a toxic newt ancestor and subsequently spread to the other exon copy via gene  
466 conversion. Both Hanifin and Gilly (2015) and Du et al. (2009) have shown that the single  
467 resistant amino acid observed in less toxic salamanders confers only low levels of TTX  
468 resistance, while the combination of the three amino acids found in highly toxic newts confers  
469 extreme resistance. As splice variants encoding the alternative exons appear to share similar  
470 expression patterns in salamanders, both exon copies should require extreme resistance in  
471 species exposed to high TTX concentrations. The concerted evolution of TTX resistance among



472 homologous P-loop domains of *SCN4A* may have expedited the evolution of extreme resistance  
473 in newt muscles, requiring new resistant mutations to appear in only one of these domains before  
474 being transferred to the other copy.

475         The degree of parallel molecular evolution among members of the *SCNA* gene family and  
476 across lineages provides insight into the constraints on *SCNA* nucleotide sequence as well as the  
477 evolvability of the TTX-resistance phenotype. Our results reveal that similar to their  
478 coevolutionary partners, *Thamnophis* garter snakes, *Taricha* newts evolved extreme TTX  
479 resistance through a stepwise process that built upon ancient changes that were in place millions  
480 of years before the arms race began. However, the pattern of TTX resistance evolution in newts  
481 also displays important differences from that of their predators. First, perhaps because of the  
482 constitutive presence of TTX, newts display extreme levels of resistance even in channels that  
483 are expressed in the central nervous system, which are protected by the blood-brain barrier in  
484 species that encounter TTX in their diet. Second, our analysis indicates that many substitutions  
485 may have become fixed relatively close to one another in evolutionary time within the clade of  
486 modern newts. This is in contrast to snakes, where key changes were separated by millions of  
487 years. Due to our lack of sampling of newt species outside of North America, however, further  
488 work is necessary to understand the timing of these changes on a finer scale. We also show that  
489 while positive selection appears to be a strong driving force of the evolution of TTX auto-  
490 resistance in newts, gene conversion may have sped up the process of adaptive evolution in some  
491 *SCNA* paralogs, and constraints have limited the possible locations and types of resistant  
492 substitutions to a small subset of realized genetic changes. Taken together, our results emphasize  
493 the interplay among selection, constraint, and historical contingency in the evolution of complex  
494 adaptations.

## 495 **Methods**

### 496 **Sequencing and annotation of voltage-gated sodium channel paralogs**

497 We identified *SCNA* genes in the two publicly available salamander genome assemblies, *A.*  
498 *mexicanum* (Smith et al. 2019; AmexG.v6 assembly) and *P. waltl* (Elewa et al. 2017), and in one  
499 full-body transcriptome from the fire salamander *S. salamandra* (Goedbloed et al. 2017;  
500 BioProject accession PRJNA607429) using the reciprocal best BLAST hit method (Moreno-  
501 Hagelsieb and Latimer 2007) with queries of *SCNA* sequences from *X. tropicalis* (Hellsten et al.  
502 2010) and salamanders (Hanifin and Gilly 2015). We confirmed assignments of each amphibian  
503 *SCNA* paralog based on nucleotide alignments of the coding sequences with *Xenopus* sequences,  
504 as well as synteny of the chromosomal segments containing *SCNA* genes (Fig. S1). These *SCNA*  
505 annotations were then used to design targeted sequencing probes and to subsequently assign  
506 paralog identity to our de novo salamander assemblies. We used Geneious v10.2.3 for sequence  
507 visualization and to create DNA and protein alignments (Kearse et al. 2012).

508 We also performed BLASTn searches of published transcriptome assemblies of  
509 *Tylototriton wenxianensis* (PRJNA323392), *Bolitoglossa valleculea* (PRJNA419601), and  
510 *Hynobius retardatus* (Matsunami et al. 2015; PRJDB2409). However, we were unable to identify  
511 the full set of *SCNA* paralogs within these three assemblies. Therefore, we used the sequences for  
512 probe design and to identify exon duplications in *SCN4A* but excluded them from PAML  
513 analyses.

514 In order to design targeted sequencing probes, we compiled partial and complete  
515 amphibian *SCNA* sequences obtained from NCBI databases and additional published sources  
516 (Table S8) into a single FASTA file. Each individual FASTA entry included a single exon and,  
517 when available, up to 200 bp of intron sequence upstream and downstream of each exon to aid in  
518 paralog assignment. Using RepeatMasker (Smit et al. 2013-2015), we replaced transposable  
519 elements and other sequence repeats with Ns, and subsequently filtered out sequences < 120 bp  
520 in length, as well as those with more than 25% missing or ambiguous characters. We submitted  
521 this masked and filtered file, which was 465 kb in total length, to Agilent Technologies (Santa  
522 Clara, CA, USA) for custom probe design using the SureSelect tool, resulting in 7518 unique  
523 120-mer probes.

524 We obtained DNA samples from adult individuals of three TTX-bearing species (n=3 for  
525 each species): *T. torosa* from Hopland, CA, *T. granulosa* from Benton, OR, and *N. viridescens*

526 from Mountain Lake, VA, and from two additional salamander species presumed to lack TTX ( $n$   
527 = 2 for each species): *P. cinereus* collected in Mountain Lake, VA and *C. alleganiensis* collected  
528 in southwestern VA. We extracted genomic DNA using the DNeasy Blood & Tissue kit (Qiagen  
529 Inc., Valencia, CA) and prepared sequencing libraries using the SureSelect<sup>XT</sup> Target Enrichment  
530 system for Illumina paired-end multiplexed sequencing from Agilent Technologies (Santa Clara,  
531 CA, USA), following the protocol for low input (200 ng) DNA samples. We used a Covaris  
532 M220 Focused-ultrasonicator to shear 200 ng of purified whole genomic DNA from each sample  
533 into ~250 bp fragments using the following settings: duty factor 10%, peak incident power 75 w,  
534 200 cycles per burst, and treatment time of 160 seconds. We followed the Agilent SureSelect<sup>XT</sup>  
535 Target Enrichment kit protocol for end repair, adaptor ligation, amplification, hybridization and  
536 bead capture (using the custom SureSelect probes described above), indexing, and purification.  
537 We quantified the resulting enriched, indexed libraries with qPCR and combined them in  
538 equimolar concentrations into one final library pool, which was submitted to the Genomics  
539 Sequencing Center at Virginia Tech for sequencing on an Illumina MiSeq 300-cycle v2 with 150  
540 bp paired-end reads. Prior to alignment, we trimmed Illumina reads of TruSeq3 adapter  
541 sequences, removed bases with a phred64 quality score less than 3, and filtered out subsequent  
542 reads shorter than 100 bp using Trimmomatic version 0.33 (Bolger et al. 2014). We used SPAdes  
543 3.6.0 (Bankevich et al. 2012) to create de novo assemblies of the trimmed and filtered reads.  
544 Each *SCNA* paralog had > 10-fold sequence coverage, with an average of 32-fold coverage  
545 across all species and paralogs (Table S1).

546 Because we designed the sequencing probes to capture only small portions of the *SCNA*  
547 intronic regions flanking exons (regions more likely to be conserved across species), each exon  
548 was assembled into a separate scaffold. For each individual from our sequencing trial, we created  
549 BLAST databases from the assembled de novo scaffolds and performed BLAST searches using  
550 single exons from the *Ambystoma SCNAs* as queries. We created 26 separate nucleotide  
551 alignments, one for each individual *SCNA* exon, including sequences from *Ambystoma*,  
552 *Pleurodeles*, and our de novo assemblies using MAFFT v 7.450 (Katoh and Standley 2013) and  
553 created consensus neighbor-joining trees with a Tamura-Nei genetic distance model using the  
554 Geneious Tree Builder (Kearse et al. 2012) with 1000 bootstrap replicates and an 80% support  
555 threshold. The resulting tree topologies were used to assign paralog identity to each of the exons.

556 When necessary, we included exon and intron sequences from additional species in the  
557 alignments to resolve the topology of the trees.

558 We concatenated all exons from each paralog into full coding sequences. Based on  
559 alignment with full-length *Xenopus* sequences, all salamander *SCNA* coding sequences collected  
560 for this study were >90% complete with the exception of two sequences from the *Salamandra*  
561 *salamandra* transcriptome (paralogs *SCN1A* and *SCN2A*, which were 68.8% and 70.7% complete  
562 respectively; Table S1). For each species, we used *SCNA* paralogs sequenced from the genome  
563 of a single individual for our downstream analyses, based on completeness of the assembly.

564

### 565 **Determination TTX resistance levels**

566 TTX sensitivity is commonly measured *in vitro* by using site-directed mutagenesis to introduce  
567 mutations of interest into a TTX-sensitive Na<sub>v</sub> channel, followed by expression in *Xenopus*  
568 oocyte or HEK 293 cells and the application of patch-clamp whole-cell recordings to measure  
569 channel current in the presence of TTX. The fold-change in TTX sensitivity is then calculated by  
570 taking the ratio of the IC<sub>50</sub> values, or the TTX concentration at which 50% of the Na<sub>v</sub> channels  
571 are blocked, of mutated and wild-type channels (see Table 3 for references).

572 Another line of evidence for resistance in salamander muscle channels (Na<sub>v</sub>1.4) comes  
573 from Hanifin and Gilly (2015), who estimated TTX sensitivity by recording action potentials  
574 generated from salamander muscle fibers and estimating the amount of TTX required to diminish  
575 the rise of the action potential, associating these relative changes with the presence and absence  
576 of substitutions in TTX-binding sites. They associated moderate TTX resistance (reduced  
577 sensitivity to 0.010 μM TTX) with the presence of DIII substitution M1240T and extreme  
578 resistance (low sensitivity to 300 μM TTX) with the presence of DIII and DIV substitutions  
579 M1240T, D1532S, and G1533D. We categorize levels of TTX resistance conferred by Na<sub>v</sub>  
580 substitutions as extreme or moderate based on the results of Hanifin and Gilly (2015) as well as  
581 the data summarized in Table 3.

582

### 583 **Phylogenetic analyses and identification of site-specific evolutionary rates**

584 We constructed phylogenetic trees for the entire *SCNA* gene family using our *de novo* assembled  
585 sequences as well as sequences from the genomes of *A. mexicanum*, *P. waltl*, the whole-body  
586 transcriptome of *S. salamandra*, two frog genomes: *X. tropicalis* (Hellsten et al. 2010) and

587 *Nanorana parkeri* (Sun et al. 2015), and one fish genome: *Danio rerio* (Howe et al. 2013). We  
588 created an amino acid alignment of translated coding sequences using MAFFT v 7.450 (Kato  
589 and Standley 2013) and constructed maximum likelihood trees from these alignments with  
590 RAxML v8.2.11 (Stamatakis 2014) in Geneious using a GAMMA BLOSSUM62 protein model  
591 and estimated clade support with 100 bootstrap replicates. In order to improve the accuracy of  
592 the nucleotide alignment, we used this amino acid alignments to guide codon alignments with  
593 PAL2NAL v14 (Suyama et al. 2006). We identified the best fitting substitution models for the  
594 nucleotide alignment using jModelTest 2.1.10 v20160303 (Darriba et al. 2012) and constructed  
595 maximum likelihood trees of the coding sequences with RAxML v8.2.11. The two models with  
596 the lowest AIC scores were (1) the transition model with unequal base frequencies, a gamma  
597 shape parameter, and some proportion of invariable sites (TIM2+I+G) and (2) a general time-  
598 reversible model with a gamma shape parameter and a proportion of invariable sites (GTR+I+G),  
599 which is nearly identical to TIM2+I+G, but includes two additional rate parameters (Posada  
600 2008). Because the two models are nearly equivalent and both fit our data equally well, we chose  
601 the GTR+I+G model for its ease of implementation across different programs. We repeated these  
602 methods for each individual *SCNA* paralog for downstream analyses in PAML, excluding the  
603 sequences from the outgroup species *N. parkeri* and *D. rerio*.

604 We estimated synonymous ( $d_S$ ) and nonsynonymous ( $d_N$ ) substitution rates, as well as  
605 the  $d_N/d_S$  ratios ( $\omega$ ) for each paralog using codeml in PAML v4.8 (Yang 2007). In order to test  
606 for changes in selective regimes in the *SCNA* genes between salamanders and highly toxic newts  
607 (*Notophthalmus* and *Taricha* species), we fit the following models to our *SCNA* alignments: (1)  
608 one-ratio models (allowing for a single  $\omega$  ratio among all sites and all branches of the  
609 phylogeny), (2) branch models (allowing for separate  $\omega$  ratios for the foreground [toxic newts]  
610 and background [other salamanders]), (3) branch-site neutral models (allowing  $\omega$  to vary both  
611 between toxic newts and other salamanders and among sites, with two possible categories:  $0 < \omega$   
612  $< 1$  and  $\omega = 1$ ), and (4) branch-site models (allowing  $\omega$  to vary both between toxic newts and  
613 other salamanders and among sites, with three possible categories:  $0 < \omega < 1$ ,  $\omega = 1$ , and  $\omega > 1$ ,  
614 the latter being allowed only within toxic newts). To test for site-specific positive selection  
615 among all salamanders, we fit two sets of nested models: (1) discrete  $\omega$  ratio models M1a vs.  
616 M2a, which allowing for  $\omega$  to vary among sites, with either two possible categories:  $0 < \omega < 1$   
617 and  $\omega = 1$  or three possible categories:  $0 < \omega < 1$ ,  $\omega = 1$ , and  $\omega > 1$ ; and (2) continuous  $\omega$  ratio

618 models M7, M8a, and M8, which fit  $\omega$  ratios of sites into a beta distribution, with ncatG (the  
619 number of  $\omega$  values in the beta distribution) set to 5. We used F3x4 codon models, which  
620 estimate individual nucleotide frequencies for each of the three codon positions, and allowed  
621 codeml to estimate  $\omega$  and transition-transversion rates ( $\kappa$ ). The outputs of these models were  
622 used to estimate and compare gene-wide  $\omega$  between toxic newts and salamanders (one-ratio and  
623 branch models), to identify sites under positive selection in all salamanders (site and neutral site  
624 models), and to identify sites under positive selection or with elevated  $\omega$  in toxic newts relative  
625 to other salamanders (branch-site neutral and branch-site models). We also created ancestral  
626 sequence reconstructions by specifying RateAncestor = 1 within codeml configuration files for  
627 the neutral site models. We performed the above analyses both including and excluding the two  
628 *S. salamandra* paralogs with a large number of gaps (*SCN1A* and *SCN2A*). Maximum likelihood  
629 parameter estimates were largely congruent using these different datasets. Therefore, we present  
630 results from the gene trees including *S. salamandra* here.

631

### 632 **Detection of gene conversion**

633 We used the program GENECONV to detect potential nonallelic gene conversion events  
634 between *SCNA* paralogs. We used a full codon alignment of all six *SCNA* paralogs from 7 of the  
635 8 salamanders included in the study (excluding *S. salamandra* due to missing data), but targeted  
636 our search to include only genes *SCN1A*, *SCN2A*, and *SCN3A* within each species under the  
637 assumption that gene conversion is more likely to occur between closely related sequences that  
638 reside on the same chromosome. This increased the power of detecting gene conversion from  
639 multiple pairwise comparisons. We also performed a separate search for gene conversion events  
640 between duplicate exons 26a and 26b of *SCN4A*. For this analysis, we used a codon alignment of  
641 *SCN4A* exons 26a and 26b from 10 salamander species. We assigned a mismatch penalty using  
642 gscale=1 and used Bonferroni-corrected *p*-values from 10,000 permutations to determine  
643 significance.

## 644 **Acknowledgments**

645 We thank Miguel Vences for helpful feedback on the manuscript and for providing an early draft  
646 of the *Salamandra salamandra* transcriptome. We also thank Vincent Farallo, Edmund Brodie  
647 III, William Hopkins, and Brian Case for providing DNA samples for this study, Kaitlyn  
648 Malewicz, Mercedes Collins, and Emily Orr for assistance with lab work, John Abramyan,  
649 Edmund Brodie III, Charles Hanifin, and Andrew Kern for helpful conversations and Matthew  
650 Hahn for advice on analyses and comments on the manuscript. Hellbender (*Cryptobranchus*)  
651 samples were collected by Brian Case and William Hopkins in cooperation with the Virginia  
652 Department of Wildlife Resources (DWR) and the U.S. Forest Service, and with assistance from  
653 J.D. Kleopfer. Hellbenders were handled under scientific collecting permit #060465 and  
654 approved Virginia Tech IACUC procedures (protocol #16-162). We thank the Departments of  
655 Fish and Wildlife in Oregon and California and the Virginia DWR for scientific collecting  
656 permits to MTJH (063-18, SC-11937 and 048104 respectively).

657

## 658 **Article and author information**

659

### 660 **Author details**

#### 661 **Kerry L Gendreau**

662 ORCID: 0000-0001-6058-0893

- 663 • Department of Biological Sciences, Virginia Tech, Blacksburg, United States

664 **Contribution:** Performed experiments, formal analysis, investigation, visualization,  
665 methodology, writing – original draft, writing – review and editing.

666 **Competing interests:** No competing interests declared.

667

#### 668 **Angela D Hornsby**

669 ORCID: 0000-0003-0927-2101

- 670 • Department of Biological Sciences, Virginia Tech, Blacksburg, United States
- 671 • Philip L. Wright Zoological Museum, Division of Biological Sciences, University of  
672 Montana, Missoula, United States

673 **Contribution:** Performed experiments, managed data, writing – review and editing.

674 **Competing interests:** No competing interests declared.

675

676 **Michael TJ Hague**

677 ORCID: 0000-0003-0641-2420

678 • Division of Biological Sciences, University of Montana, Missoula, MT, United States

679 **Contribution:** Collected samples, extracted and purified DNA, writing – review and editing.

680 **Competing interests:** No competing interests declared.

681

682 **Joel W McGlothlin**

683 ORCID: 0000-0003-3645-6264

684 • Department of Biological Sciences, Virginia Tech, Blacksburg, United States

685 **Contribution:** Conceptualization, investigation, formal analysis, writing – review and editing.

686 **Competing interests:** No competing interests declared.

687

688 **Funding**

689 **National Science Foundation (DEB-1457463)**

690 • Joel W McGlothlin

691 **National Science Foundation (DEB-1601296)**

692 • Michael TJ Hague

693 **National Science Foundation (IOS-1755055)**

694 • Joel W McGlothlin

695 **Society for the Study of Evolution (R. C. Lewontin Award)**

696 • Kerry L Gendreau

697 **Virginia Tech Interfaces of Global Change (Graduate Fellowship Award)**

698 • Kerry L Gendreau

699

700 **Data availability**

701 Newly generated sequences will be submitted to NCBI. Sequence alignments and configuration

702 files for GENECONV analyses have been deposited at <https://github.com/kerrygendreau/Newt->

703 [TTX-Resistance.git](https://github.com/kerrygendreau/Newt-TTX-Resistance.git)



## 704 **References**

705

706 Anisimova, M., J. P. Bielawski and Z. Yang. (2001). Accuracy and power of the likelihood ratio  
707 test in detecting adaptive molecular evolution. *Mol Biol Evol* 18 (8): 1585-1592.  
708 10.1093/oxfordjournals.molbev.a003945

709 Arbuckle, K., R. C. Rodríguez de la Vega and N. R. Casewell. (2017). Coevolution takes the  
710 sting out of it: Evolutionary biology and mechanisms of toxin resistance in animals.  
711 *Toxicon* 140 118-131. 10.1016/j.toxicon.2017.10.026

712 Bankevich, A., S. Nurk, D. Antipov, A. A. Gurevich, M. Dvorkin, A. S. Kulikov, *et al.* (2012).  
713 SPAdes: A new genome assembly algorithm and its applications to single-cell  
714 sequencing. *J Comput Biol* 19 (5): 455-477. 10.1089/cmb.2012.0021

715 Bay, R. A. and J. P. Bielawski. (2011). Recombination detection under evolutionary scenarios  
716 relevant to functional divergence. *J Mol Evol* 73 (5-6): 273-286. 10.1007/s00239-011-  
717 9473-0

718 Benovoy, D. and G. Drouin. (2009). Ectopic gene conversions in the human genome. *Genomics*  
719 93 (1): 27-32. 10.1016/j.ygeno.2008.09.007

720 Bolger, A. M., M. Lohse and B. Usadel. (2014). Trimmomatic: a flexible trimmer for Illumina  
721 sequence data. *Bioinformatics* 30 (15): 2114-2120. 10.1093/bioinformatics/btu170

722 Bricelj, V. M., L. Connell, K. Konoki, S. P. MacQuarrie, T. Scheuer, W. A. Catterall, *et al.*  
723 (2005). Sodium channel mutation leading to saxitoxin resistance in clams increases risk  
724 of PSP. *Nature* 434 (7034): 763-767. 10.1038/nature03415

725 Brodie, E. D., III and E. D. Brodie, Jr. (1990). Tetrodotoxin resistance in garter snakes: an  
726 evolutionary response of predators to dangerous prey. *Evolution* 44 (3): 651-659.  
727 10.1111/j.1558-5646.1990.tb05945.x

728 Brodie, E. D., Jr., B. J. Ridenhour and E. D. Brodie, III. (2002). The evolutionary response of  
729 predators to dangerous prey: hotspots and coldspots in the geographic mosaic of  
730 coevolution between garter snakes and newts. *Evolution* 56 (10): 2067-2082.  
731 10.1111/j.0014-3820.2002.tb00132.x

732 Bryant, D. M., K. Johnson, T. DiTommaso, T. Tickle, M. B. Couger, D. Payzin-Dogru, *et al.*  
733 (2017). A tissue-mapped axolotl de novo transcriptome enables identification of limb  
734 regeneration factors. *Cell Rep* 18 (3): 762-776. 10.1016/j.celrep.2016.12.063

735 Caballero-Pérez, J., A. Espinal-Centeno, F. Falcon, L. F. García-Ortega, E. Curiel-Quesada, A.  
736 Cruz-Hernández, *et al.* (2018). Transcriptional landscapes of Axolotl (*Ambystoma*  
737 *mexicanum*). *Dev Biol* 433 (2): 227-239. 10.1016/j.ydbio.2017.08.022

- 738 Casola, C. and M. W. Hahn. (2009). Gene conversion among paralogs results in moderate false  
739 detection of positive selection using likelihood methods. *J Mol Evol* 68 (6): 679-687.  
740 10.1007/s00239-009-9241-6
- 741 Casola, C., U. Zekonyte, A. D. Phillips, D. N. Cooper and M. W. Hahn. (2012). Interlocus gene  
742 conversion events introduce deleterious mutations into at least 1% of human genes  
743 associated with inherited disease. *Genome Res* 22 (3): 429-435. 10.1101/gr.127738.111
- 744 Chapman, B. A., J. E. Bowers, F. A. Feltus and A. H. Paterson. (2006). Buffering of crucial  
745 functions by paleologous duplicated genes may contribute cyclicality to angiosperm  
746 genome duplication. *P Natl Acad Sci USA* 103 (8): 2730. 10.1073/pnas.0507782103
- 747 Chen, J.-M., D. N. Cooper, N. Chuzhanova, C. Férec and G. P. Patrinos. (2007). Gene  
748 conversion: mechanisms, evolution and human disease. 8 (10): 762-775.  
749 10.1038/nrg2193
- 750 Darriba, D., G. L. Taboada, R. Doallo and D. Posada. (2012). jModelTest 2: more models, new  
751 heuristics and parallel computing. *Nat Methods* 9 (8): 772-772. 10.1038/nmeth.2109
- 752 Drouin, G. (2002). Characterization of the gene conversions between the multigene family  
753 members of the yeast genome. *J Mol Evol* 55 (1): 14-23. 10.1007/s00239-001-0085-y
- 754 Du, Y., Y. Nomura, Z. Liu, Z. Y. Huang and K. Dong. (2009). Functional expression of an  
755 arachnid sodium channel reveals residues responsible for tetrodotoxin resistance in  
756 invertebrate sodium channels. *J Biol Chem* 284 (49): 33869-33875.  
757 10.1074/jbc.M109.045690
- 758 Ducey, P. K., M. Messere, K. Lapoint and S. Noce. (1999). Lumbricid prey and potential  
759 herpetofaunal predators of the invading terrestrial flatworm *Bipalium adventitium*  
760 (*Turbellaria: Tricladida: Terricola*). *Am Midl Nat* 141 (2): 305-314. 10.1674/0003-  
761 0031(1999)141[0305:LPAPHP]2.0.CO;2
- 762 Elewa, A., H. Wang, C. Talavera-López, A. Joven, G. Brito, A. Kumar, *et al.* (2017). Reading  
763 and editing the *Pleurodeles waltl* genome reveals novel features of tetrapod regeneration.  
764 *Nat Commun* 8 (1): 2286. 10.1038/s41467-017-01964-9
- 765 Feldman, C. R., E. D. Brodie, Jr., E. D. Brodie, III and M. E. Pfrender. (2012). Constraint shapes  
766 convergence in tetrodotoxin-resistant sodium channels of snakes. *Proc Natl Acad Sci*  
767 *USA* 109 (12): 4556-4561. 10.1073/pnas.1113468109
- 768 Fux, J. E., A. Mehta, J. Moffat and J. D. Spafford. (2018). Eukaryotic voltage-gated sodium  
769 channels: on their origins, asymmetries, losses, diversification and adaptations. *Front*  
770 *Physiol* 9 1406. 10.3389/fphys.2018.01406
- 771 Galtier, N., L. Duret, S. Glémin and V. Ranwez. (2009). GC-biased gene conversion promotes  
772 the fixation of deleterious amino acid changes in primates. *Trends Genet* 25 (1): 1-5.  
773 10.1016/j.tig.2008.10.011

- 774 Geffenev, S. L., E. D. Brodie, Jr., P. C. Ruben and E. D. Brodie, III. (2002). Mechanisms of  
775 adaptation in a predator-prey arms race: TTX-resistant sodium channels. *Science* 297  
776 (5585): 1336-1339. 10.1126/science.1074310
- 777 Geffenev, S. L., E. Fujimoto, E. D. Brodie, III, E. D. Brodie, Jr. and P. C. Ruben. (2005).  
778 Evolutionary diversification of TTX-resistant sodium channels in a predator-prey  
779 interaction. *Nature* 434 (7034): 759-763. 10.1038/nature03444
- 780 Go, Y., Y. Satta, Y. Kawamoto, G. Rakotoarisoa, A. Randrianjafy, N. Koyama, *et al.* (2003).  
781 Frequent segmental sequence exchanges and rapid gene duplication characterize the  
782 MHC class I genes in lemurs. *Immunogenetics* 55 (7): 450-461. 10.1007/s00251-003-  
783 0613-6
- 784 Goedbloed, D. J., T. Czypionka, J. Altmüller, A. Rodriguez, E. Kűpfer, O. Segev, *et al.* (2017).  
785 Parallel habitat acclimatization is realized by the expression of different genes in two  
786 closely related salamander species (genus *Salamandra*). *Heredity* 119 (6): 429-437.  
787 10.1038/hdy.2017.55
- 788 Graham, A. M. and K. G. McCracken. (2019). Convergent evolution on the hypoxia-inducible  
789 factor (HIF) pathway genes EGLN1 and EPAS1 in high-altitude ducks. *Heredity* 122 (6):  
790 819-832. 10.1038/s41437-018-0173-z
- 791 Hague, M. T. J., A. N. Stokes, C. R. Feldman, E. D. Brodie Jr. and E. D. Brodie III. (2020). The  
792 geographic mosaic of arms race coevolution is closely matched to prey population  
793 structure. *Evol Lett* 4 (4): 317-332. 10.1002/evl3.184
- 794 Hanifin, C. T. (2010). The chemical and evolutionary ecology of tetrodotoxin (TTX) toxicity in  
795 terrestrial vertebrates. *Mar Drugs* 8 (3): 577-593. 10.3390/Md8030577
- 796 Hanifin, C. T. and W. F. Gilly. (2015). Evolutionary history of a complex adaptation:  
797 tetrodotoxin resistance in salamanders. *Evolution* 69 (1): 232-244. 10.1111/evo.12552
- 798 Hanikenne, M., J. Kroymann, A. Trampczynska, M. Bernal, P. Motte, S. Clemens, *et al.* (2013).  
799 Hard selective sweep and ectopic gene conversion in a gene cluster affording  
800 environmental adaptation. *PLOS Genet* 9 (8): e1003707. 10.1371/journal.pgen.1003707
- 801 Hansen, T. F., A. J. R. Carter and C.-H. Chiu. (2000). Gene conversion may aid adaptive peak  
802 shifts. *J Theor Biol* 207 (4): 495-511. 10.1006/jtbi.2000.2189
- 803 Hellsten, U., R. M. Harland, M. J. Gilchrist, D. Hendrix, J. Jurka, V. Kapitonov, *et al.* (2010).  
804 The genome of the western clawed frog *Xenopus tropicalis*. *Science* 328 (5978): 633-636.  
805 10.1126/science.1183670
- 806 Hime, P. M., A. R. Lemmon, E. C. M. Lemmon, E. Prendini, J. M. Brown, R. C. Thomson, *et al.*  
807 (2021). Phylogenomics reveals ancient gene tree discordance in the amphibian tree of  
808 life. *Syst Biol* 70 (1): 49-66. 10.1093/sysbio/syaa034

- 809 Howe, K., M. D. Clark, C. F. Torroja, J. Turrance, C. Berthelot, M. Muffato, *et al.* (2013). The  
810 zebrafish reference genome sequence and its relationship to the human genome. *Nature*  
811 496 (7446): 498-503. 10.1038/nature12111
- 812 Jeziorski, M. C., R. M. Greenberg and P. A. V. Anderson. (1997). Cloning of a putative voltage-  
813 gated sodium channel from the turbellarian flatworm *Bdelloura candida*. *Parasitology*  
814 115 (3): 289-296. 10.1017/S0031182097001388
- 815 Jost, M. C., D. M. Hillis, Y. Lu, J. W. Kyle, H. A. Fozzard and H. H. Zakon. (2008). Toxin-  
816 resistant sodium channels: parallel adaptive evolution across a complete gene family. *Mol*  
817 *Biol Evol* 25 (6): 1016-1024. DOI 10.1093/molbev/msn025
- 818 Katoh, K. and D. M. Standley. (2013). MAFFT multiple sequence alignment software version 7:  
819 improvements in performance and usability. *Mol Biol Evol* 30 (4): 772-780.  
820 10.1093/molbev/mst010
- 821 Kearse, M., R. Moir, A. Wilson, S. Stones-Havas, M. Cheung, S. Sturrock, *et al.* (2012).  
822 Geneious Basic: An integrated and extendable desktop software platform for the  
823 organization and analysis of sequence data. *Bioinformatics* 28 (12): 1647-1649.  
824 10.1093/bioinformatics/bts199
- 825 Khakhlova, O. and R. Bock. (2006). Elimination of deleterious mutations in plastid genomes by  
826 gene conversion. *Plant J* 46 (1): 85-94. 10.1111/j.1365-313X.2006.02673.x
- 827 Kosakovsky Pond, S. L. and S. D. W. Frost. (2005). Not so different after all: a comparison of  
828 methods for detecting amino acid sites under selection. *Mol Biol Evol* 22 (5): 1208-1222.  
829 10.1093/molbev/msi105
- 830 Kuhner, M. K., D. A. Lawlor, P. D. Ennis and P. Parham. (1991). Gene conversion in the  
831 evolution of the human and chimpanzee MHC class I loci. *Tissue Antigens* 38 (4): 152-  
832 64. 10.1111/j.1399-0039.1991.tb01889.x
- 833 Leffler, A., R. I. Herzog, S. D. Dib-Hajj, S. G. Waxman and T. R. Cummins. (2005).  
834 Pharmacological properties of neuronal TTX-resistant sodium channels and the role of a  
835 critical serine pore residue. *Pflug Arch Eur J Phy* 451 (3): 454-463. 10.1007/s00424-005-  
836 1463-x
- 837 Losos, J. B. (2011). Convergence, adaptation, and constraint. *Evolution* 65 (7): 1827-1840.  
838 10.1111/j.1558-5646.2011.01289.x
- 839 Márquez, R., V. Ramírez-Castañeda and A. Amézquita. (2019). Does batrachotoxin  
840 autoresistance coevolve with toxicity in *Phylllobates* poison-dart frogs? *Evolution* 73 (2):  
841 390-400. 10.1111/evo.13672
- 842 Maruta, S., K. Yamaoka and M. Yotsu-Yamashita. (2008). Two critical residues in P-loop  
843 regions of pufferfish Na<sup>+</sup> channels on TTX sensitivity. *Toxicon* 51 (3): 381-387.  
844 10.1016/j.toxicon.2007.10.014

- 845 Matsunami, M., J. Kitano, O. Kishida, H. Michimae, T. Miura and K. Nishimura. (2015).  
846 Transcriptome analysis of predator- and prey-induced phenotypic plasticity in the  
847 Hokkaido salamander (*Hynobius retardatus*). *Mol Ecol* 24 (12): 3064-3076.  
848 10.1111/mec.13228
- 849 McGlothlin, J. W., J. P. Chuckalovcak, D. E. Janes, S. V. Edwards, C. R. Feldman, E. D. Brodie,  
850 Jr., *et al.* (2014). Parallel evolution of tetrodotoxin resistance in three voltage-gated  
851 sodium channel genes in *Thamnophis sirtalis*. *Mol Biol Evol* 31 (11): 2386-2846.  
852 10.1093/molbev/msu237
- 853 McGlothlin, J. W., M. E. Kobiela, C. R. Feldman, T. A. Castoe, F. J. Vonk, M. K. Richardson, *et*  
854 *al.* (2016). Historical contingency in a multigene family facilitates adaptive evolution of  
855 toxin resistance. *Curr Biol* 26 1616-1621. 10.1016/j.cub.2016.04.056
- 856 McGrath, C. L., C. Casola and M. W. Hahn. (2009). Minimal effect of ectopic gene conversion  
857 among recent duplicates in four mammalian genomes. *Genetics* 182 (2): 615-622.  
858 10.1534/genetics.109.101428
- 859 Moreno-Hagelsieb, G. and K. Latimer. (2007). Choosing BLAST options for better detection of  
860 orthologs as reciprocal best hits. *Bioinformatics* 24 (3): 319-324.  
861 10.1093/bioinformatics/btm585
- 862 Nowoshilow, S., S. Schloissnig, J.-F. Fei, A. Dahl, A. W. C. Pang, M. Pippel, *et al.* (2018). The  
863 axolotl genome and the evolution of key tissue formation regulators. *Nature* 554 (7690):  
864 50-55. 10.1038/nature25458
- 865 Ohta, T. (1989). The mutational load of a multigene family with uniform members. *Genet Res* 53  
866 (2): 141-145. 10.1017/S0016672300028020
- 867 Perry, B. W., D. C. Card, J. W. McGlothlin, G. I. M. Pasquesi, R. H. Adams, D. R. Schield, *et al.*  
868 (2018). Molecular adaptations for sensing and securing prey and insight into amniote  
869 genome diversity from the garter snake genome. *Genome Biol Evol* 10 (8): 2110-2129.  
870 10.1093/gbe/evy157
- 871 Petschenka, G., V. Wagschal, M. von Tschirnhaus, A. Donath and S. Dobler. (2017).  
872 Convergently evolved toxic secondary metabolites in plants drive the parallel molecular  
873 evolution of insect resistance. *Am Nat* 190 (S1): S29-S43. 10.1086/691711
- 874 Posada, D. (2008). jModelTest: Phylogenetic model averaging. *Mol Biol Evol* 25 (7): 1253-1256.  
875 10.1093/molbev/msn083
- 876 Posada, D. and K. A. Crandall. (2001). Evaluation of methods for detecting recombination from  
877 DNA sequences: computer simulations. *P Natl Acad Sci USA* 98 (24): 13757-13762.  
878 10.1073/pnas.241370698
- 879 Rodríguez, A., J. D. Burgon, M. Lyra, I. Irisarri, D. Baurain, L. Blaustein, *et al.* (2017). Inferring  
880 the shallow phylogeny of true salamanders (*Salamandra*) by multiple phylogenomic  
881 approaches. *Mol Phylogenet Evol* 115 16-26. 10.1016/j.ympev.2017.07.009

- 882 Sawyer, S. A. (1999). GENECONV: a computer package for the statistical detection of gene  
883 conversion. <http://www.math.wustl.edu/~sawyer>.
- 884 Semple, C. and K. H. Wolfe. (1999). Gene duplication and gene conversion in the  
885 *Caenorhabditis elegans* genome. *J Mol Evol* 48 (5): 555-564. 10.1007/pl00006498
- 886 Signore, A. V., Y.-Z. Yang, Q.-Y. Yang, G. Qin, H. Moriyama, R.-L. Ge, *et al.* (2019). Adaptive  
887 changes in hemoglobin function in high-altitude Tibetan canids were derived via gene  
888 conversion and introgression. *Mol Biol Evol* 36 (10): 2227-2237.  
889 10.1093/molbev/msz097
- 890 Smit, A., R. Hubley and P. Green. (2013-2015). RepeatMasker Open-4.0. Retrieved from  
891 <http://www.repeatmasker.org>
- 892 Smith, J. J., N. Timoshevskaya, V. A. Timoshevskiy, M. C. Keinath, D. Hardy and S. R. Voss.  
893 (2019). A chromosome-scale assembly of the axolotl genome. *Genome Res* 29 (2): 317-  
894 324. 10.1101/gr.241901.118
- 895 Smith, S. D., M. W. Pennell, C. W. Dunn and S. V. Edwards. (2020). Phylogenetics is the new  
896 genetics (for most of biodiversity). *Trends Ecol Evol* 35 (5): 415-425.  
897 10.1016/j.tree.2020.01.005
- 898 Soong, T. W. and B. Venkatesh. (2006). Adaptive evolution of tetrodotoxin resistance in  
899 animals. *Trends Genet* 22 (11): 621-626. DOI 10.1016/j.tig.2006.08.010
- 900 Stamatakis, A. (2014). RAxML version 8: a tool for phylogenetic analysis and post-analysis of  
901 large phylogenies. *Bioinformatics* 30 (9): 1312-1313. 10.1093/bioinformatics/btu033
- 902 Stokes, A. N., P. K. Ducey, L. Neuman-Lee, C. T. Hanifin, S. S. French, M. E. Pfrender, *et al.*  
903 (2014). Confirmation and distribution of tetrodotoxin for the first time in terrestrial  
904 Invertebrates: two terrestrial flatworm species (*Bipalium adventitium* and *Bipalium*  
905 *kewense*). *PLOS One* 9 (6): e100718. 10.1371/journal.pone.0100718
- 906 Storz, J. F. (2016). Causes of molecular convergence and parallelism in protein evolution. *Nat*  
907 *Rev Genet* 17 (4): 239-250. 10.1038/nrg.2016.11
- 908 Sun, Y. B., Z. J. Xiong, X. Y. Xiang, S. P. Liu, W. W. Zhou, X. L. Tu, *et al.* (2015). Whole-  
909 genome sequence of the Tibetan frog *Nanorana parkeri* and the comparative evolution of  
910 tetrapod genomes. *P Natl Acad Sci USA* 112 (11): E1257. 10.1073/pnas.1501764112
- 911 Sunami, A., I. W. Glaaser and H. A. Fozzard. (2000). A critical residue for isoform difference in  
912 tetrodotoxin affinity is a molecular determinant of the external access path for local  
913 anesthetics in the cardiac sodium channel. *P Natl Acad Sci USA* 97 (5): 2326-2331.  
914 10.1073/pnas.030438797
- 915 Suyama, M., D. Torrents and P. Bork. (2006). PAL2NAL: robust conversion of protein sequence  
916 alignments into the corresponding codon alignments. *Nucleic Acids Res* 34 (Web Server  
917 issue): W609-W612. 10.1093/nar/gkl315

- 918 Tarvin, R. D., C. M. Borghese, W. Sachs, J. C. Santos, Y. Lu, L. A. O'Connell, *et al.* (2017).  
919 Interacting amino acid replacements allow poison frogs to evolve epibatidine resistance.  
920 *Science* 357 (6357): 1261-1266. 10.1126/science.aan5061
- 921 Vaelli, P. M., K. R. Theis, J. E. Williams, L. A. O'Connell, J. A. Foster and H. L. Eisthen.  
922 (2020). The skin microbiome facilitates adaptive tetrodotoxin production in poisonous  
923 newts. *eLife* 9 e53898. 10.7554/eLife.53898
- 924 Venkat, A., M. W. Hahn and J. W. Thornton. (2018). Multinucleotide mutations cause false  
925 inferences of lineage-specific positive selection. *Nat Ecol Evol* 2 (8): 1280-1288.  
926 10.1038/s41559-018-0584-5
- 927 Venkatesh, B., S. Q. Lu, N. Dandona, S. L. See, S. Brenner and T. W. Soong. (2005). Genetic  
928 basis of tetrodotoxin resistance in pufferfishes. *Curr Biol* 15 (22): 2069-2072.  
929 10.1016/j.cub.2005.10.068
- 930 Widmark, J., G. Sundström, D. Ocampo Daza and D. Larhammar. (2011). Differential evolution  
931 of voltage-gated sodium channels in tetrapods and teleost fishes. *Mol Biol Evol* 28 (1):  
932 859-871. 10.1093/molbev/msq257
- 933 Williams, B. L., C. T. Hanifin, E. D. Brodie, Jr. and E. D. Brodie, III. (2010). Tetrodotoxin  
934 affects survival probability of rough-skinned newts (*Taricha granulosa*) faced with TTX-  
935 resistant garter snake predators (*Thamnophis sirtalis*). *Chemoecology* 20 (4): 285-290.  
936 DOI 10.1007/s00049-010-0057-z
- 937 Yang, Z. (1998). Likelihood ratio tests for detecting positive selection and application to primate  
938 lysozyme evolution. *Mol Biol Evol* 15 (5): 568-573.  
939 10.1093/oxfordjournals.molbev.a025957
- 940 Yang, Z. and M. dos Reis. (2010). Statistical properties of the branch-site test of positive  
941 selection. *Mol Biol Evol* 28 (3): 1217-1228. 10.1093/molbev/msq303
- 942 Yang, Z., R. Nielsen, N. Goldman and A.-M. K. Pedersen. (2000). Codon-substitution models  
943 for heterogeneous selection pressure at amino acid sites. *Genetics* 155 (1): 431-449.
- 944 Yang, Z., W. S. W. Wong and R. Nielsen. (2005). Bayes empirical Bayes inference of amino  
945 acid sites under positive selection. *Mol Biol Evol* 22 (4): 1107-1118.  
946 10.1093/molbev/msi097
- 947 Yang, Z. H. (2007). PAML 4: Phylogenetic analysis by maximum likelihood. *Mol Biol Evol* 24  
948 (8): 1586-1591. DOI 10.1093/molbev/msm088
- 949 Yu, F. H. and W. A. Catterall. (2003). Overview of the voltage-gated sodium channel family.  
950 *Genome Biol* 4 (3): 207. 10.1186/gb-2003-4-3-207
- 951 Zakon, H. H. (2012). Adaptive evolution of voltage-gated sodium channels: The first 800 million  
952 years. *P Natl Acad Sci USA* 109 (Supplement 1): 10619-10625. DOI  
953 10.1073/pnas.1201884109

- 954 Zakon, H. H., M. C. Jost and Y. Lu. (2011). Expansion of voltage-dependent Na<sup>+</sup> channel gene  
955 family in early tetrapods coincided with the emergence of terrestriality and increased  
956 brain complexity. *Mol Biol Evol* 28 (4): 1415-1424. DOI 10.1093/molbev/msq325
- 957 Zhang, J., R. Nielsen and Z. Yang. (2005). Evaluation of an improved branch-site likelihood  
958 method for detecting positive selection at the molecular level. *Mol Biol Evol* 22 (12):  
959 2472-2479. 10.1093/molbev/msi237
- 960 Zhen, Y., M. L. Aardema, E. M. Medina, M. Schumer and P. Andolfatto. (2012). Parallel  
961 molecular evolution in an herbivore community. *Science* 337 (6102): 1634-1637.  
962 10.1126/science.1226630  
963



## Supporting information

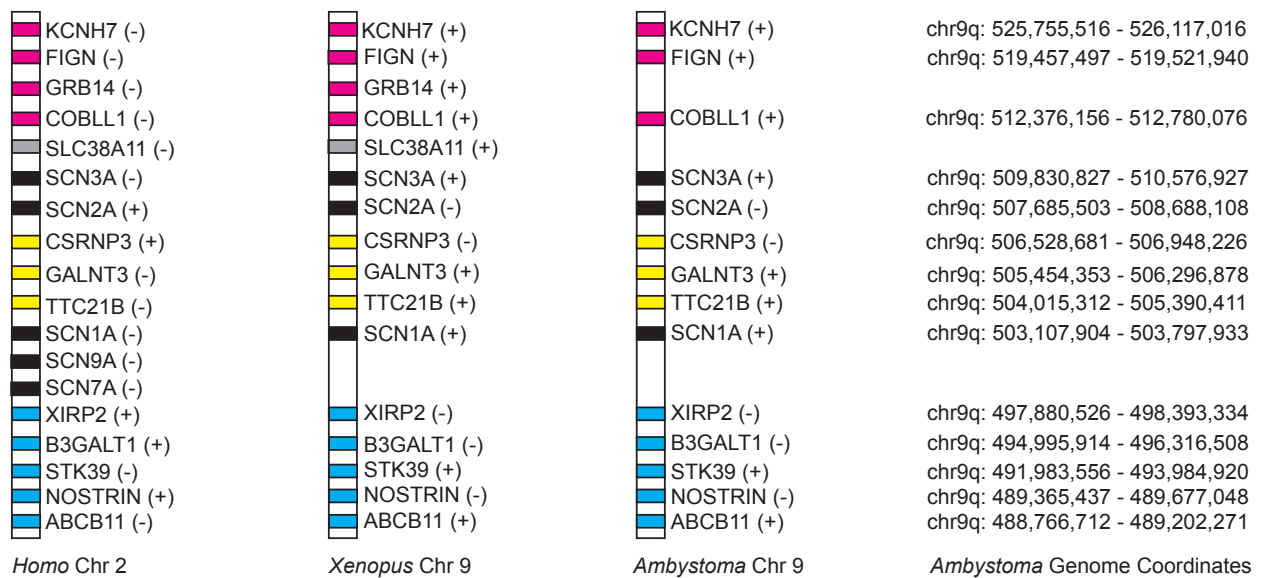

**Figure S1. Conserved synteny of voltage-gated sodium channel paralogs across tetrapods.** The genetic configuration of brain/nerve voltage-gated sodium channels (*SCNA* genes) is highly conserved across three tetrapod species: humans (*Homo*), frogs (*Xenopus*), and salamanders (*Ambystoma*). Genome coordinates are based on the AmexG.v6 assembly. Symbols (+) and (-) refer to gene orientation within this reference genome.

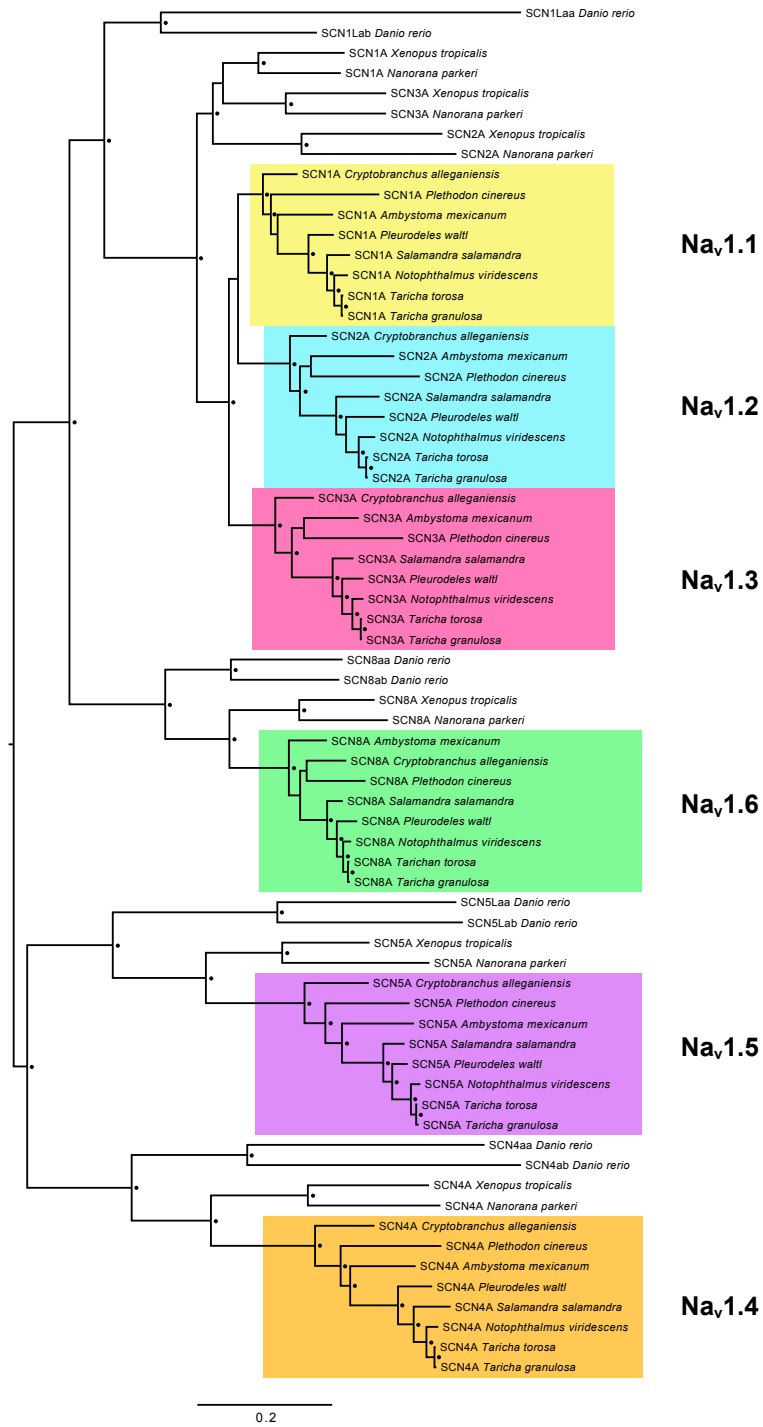

**Figure S2.** Maximum likelihood tree constructed from 6789 bp coding sequence alignment of salamander SCNA gene coding sequences with sequences from frogs (*Nanorana parkeri* and *Xenopus tropicalis*) and fish (*Danio rerio*) as outgroups. Black circles indicate nodes with bootstrap support >90%.

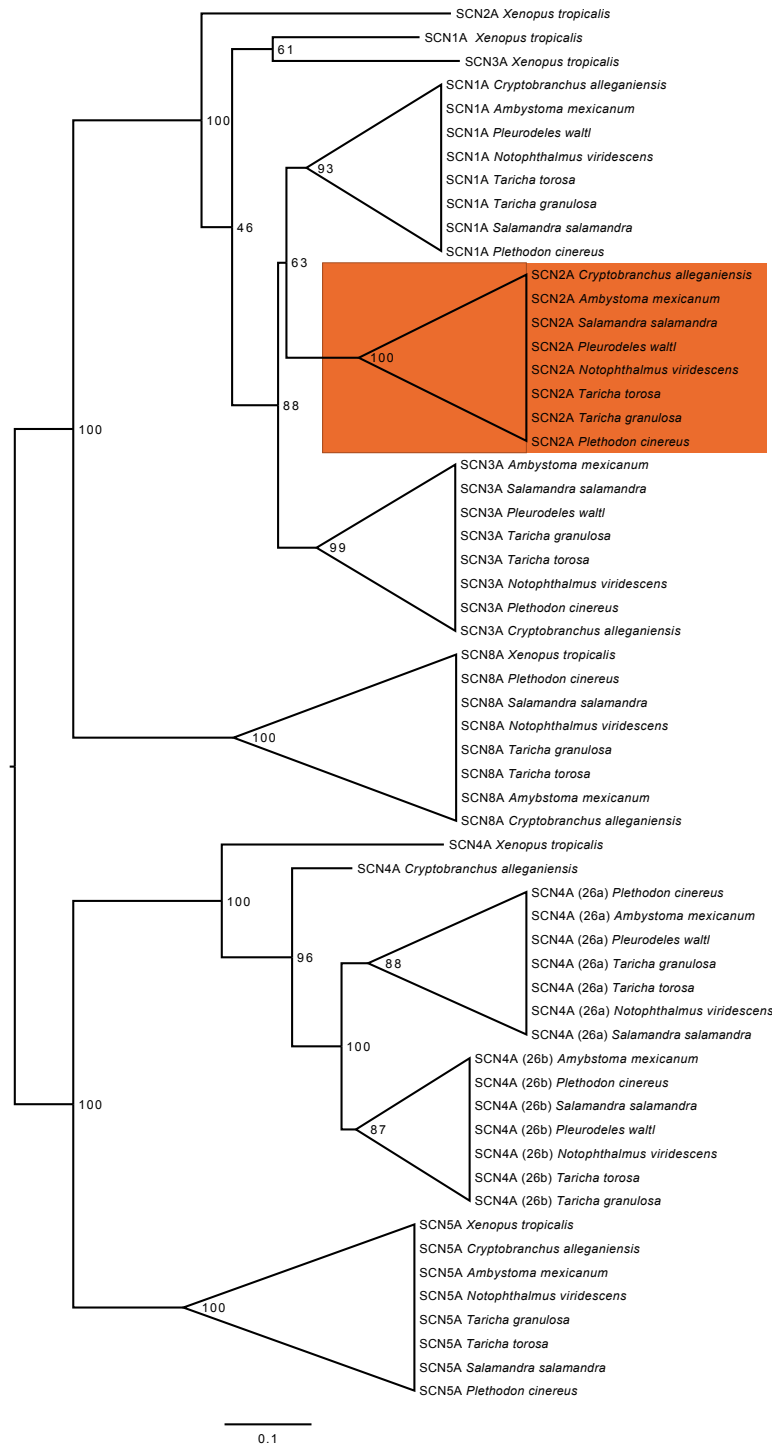

**Figure S3.** Maximum likelihood tree constructed from 1063 bp nucleotide alignment of SCNA exon 26 sequences. Node labels indicate bootstrap support from 100 replicates. Orange highlighting indicates clade grouping SCN2A from *Ambystoma* and other salamander species (bootstrap support 100%).

**Table S1. Summary statistics from salamander SCNA sequencing and alignments.** For each sequence, percent complete is calculated from the number of base pairs in a sequence divided by the total alignment length and pairwise percent identity is calculated from the average of all pairwise comparisons within an alignment. Average coverage is reported for all paralogs sequenced *de novo* in this study; sequences with unreported coverage were obtained from already published assemblies.

| <b>SCN1A (Na.1.1)</b>               | <b>GC %</b> | <b>Length</b> | <b>Gaps</b> | <b>% Gaps</b> | <b>% Complete</b> | <b>Pairwise % identity</b> | <b>Average coverage</b> |
|-------------------------------------|-------------|---------------|-------------|---------------|-------------------|----------------------------|-------------------------|
| <i>Ambystoma mexicanum</i>          | 42.3        | 6224          | 165         | 2.7           | 97.3              | 81.8                       | -                       |
| <i>Pleurodeles waltl</i>            | 42.0        | 6149          | 390         | 6.3           | 93.7              | 81.9                       | -                       |
| <i>Cryptobranchus alleganiensis</i> | 42.5        | 6216          | 162         | 2.6           | 97.4              | 81.6                       | 21.44                   |
| <i>Notophthalmus viridescens</i>    | 41.5        | 6188          | 231         | 3.7           | 96.3              | 84.3                       | 21.33                   |
| <i>Taricha granulosa</i>            | 41.5        | 6224          | 201         | 3.2           | 96.8              | 85.2                       | 42.41                   |
| <i>Taricha torosa</i>               | 41.4        | 6224          | 159         | 2.6           | 97.4              | 85.4                       | 39.88                   |
| <i>Salamandra salamandra</i>        | 41.6        | 5915          | 1846        | 31.2          | 68.8              | 60.2                       | -                       |
| <i>Plethodon cinereus</i>           | 46.1        | 6219          | 477         | 7.7           | 92.3              | 75.1                       | 13.42                   |
| <i>Xenopus tropicalis</i>           | 41.2        | 6216          | 153         | 2.5           | 97.5              | 73.4                       | -                       |
| <b>SCN2A (Na.1.2)</b>               | <b>GC %</b> | <b>Length</b> | <b>Gaps</b> | <b>% Gaps</b> | <b>% Complete</b> | <b>Pairwise % Identity</b> | <b>Average coverage</b> |
| <i>Ambystoma mexicanum</i>          | 43.5        | 5946          | 402         | 6.8           | 93.2              | 70.9                       | -                       |
| <i>Pleurodeles waltl</i>            | 41.5        | 5982          | 108         | 1.8           | 98.2              | 79.7                       | -                       |
| <i>Cryptobranchus alleganiensis</i> | 41.3        | 6000          | 438         | 7.3           | 92.7              | 74.9                       | 18.6                    |
| <i>Notophthalmus viridescens</i>    | 42.3        | 6039          | 432         | 7.2           | 92.8              | 13.4                       | 22.54                   |
| <i>Taricha granulosa</i>            | 41.8        | 6060          | 75          | 1.2           | 98.8              | 81.7                       | 40.43                   |
| <i>Taricha torosa</i>               | 41.9        | 6060          | 69          | 1.1           | 98.9              | 81.6                       | 34.32                   |
| <i>Salamandra salamandra</i>        | 41.9        | 3672          | 1077        | 29.3          | 70.7              | 56.8                       | -                       |
| <i>Plethodon cinereus</i>           | 46.7        | 6006          | 700         | 10            | 90.0              | 68.4                       | 22.7                    |
| <i>Xenopus tropicalis</i>           | 41.4        | 6054          | 141         | 2.3           | 97.7              | 66.4                       | -                       |
| <b>SCN3A (Na.1.3)</b>               | <b>GC %</b> | <b>Length</b> | <b>Gaps</b> | <b>% Gaps</b> | <b>% Complete</b> | <b>Pairwise % Identity</b> | <b>Average coverage</b> |
| <i>Ambystoma mexicanum</i>          | 45          | 6072          | 51          | 0.8           | 99.2              | 83.3                       | -                       |
| <i>Pleurodeles waltl</i>            | 42.3        | 6069          | 195         | 3.2           | 96.8              | 85.9                       | -                       |
| <i>Cryptobranchus alleganiensis</i> | 43.3        | 6093          | 39          | 0.6           | 99.4              | 83.7                       | 23.59                   |
| <i>Notophthalmus viridescens</i>    | 42.4        | 6078          | 72          | 1.2           | 98.8              | 88.3                       | 49.48                   |
| <i>Taricha granulosa</i>            | 42.3        | 6093          | 72          | 1.2           | 98.8              | 88.6                       | 42.71                   |
| <i>Taricha torosa</i>               | 42.2        | 6099          | 72          | 1.2           | 98.8              | 88.6                       | 40.9                    |
| <i>Salamandra salamandra</i>        | 42.9        | 6096          | 186         | 3.1           | 96.9              | 85.3                       | -                       |
| <i>Plethodon cinereus</i>           | 47.9        | 6096          | 510         | 8.4           | 91.6              | 75.1                       | 14.44                   |
| <i>Xenopus tropicalis</i>           | 42.2        | 6093          | 36          | 0.6           | 99.4              | 75.5                       | -                       |
| <b>SCN4A (Na.1.4)</b>               | <b>GC %</b> | <b>Length</b> | <b>Gaps</b> | <b>% Gaps</b> | <b>% Complete</b> | <b>Pairwise % Identity</b> | <b>Average coverage</b> |
| <i>Ambystoma mexicanum</i>          | 43.4        | 5034          | 141         | 2.8           | 97.2              | 81.8                       | -                       |
| <i>Pleurodeles waltl</i>            | 43.3        | 5622          | 96          | 1.7           | 98.3              | 85.3                       | -                       |
| <i>Cryptobranchus alleganiensis</i> | 46.2        | 5580          | 48          | 0.9           | 99.1              | 80.9                       | 12.46                   |
| <i>Notophthalmus viridescens</i>    | 43.6        | 5622          | 96          | 1.7           | 98.3              | 87.1                       | 47.29                   |
| <i>Taricha granulosa</i>            | 44          | 5469          | 87          | 1.6           | 98.4              | 87.3                       | 35.46                   |
| <i>Taricha torosa</i>               | 44          | 5469          | 90          | 1.6           | 98.4              | 87.4                       | 42.97                   |
| <i>Salamandra salamandra</i>        | 44.5        | 5619          | 135         | 2.4           | 97.6              | 85.4                       | -                       |
| <i>Plethodon cinereus</i>           | 43.5        | 5628          | 279         | 5             | 95                | 78.2                       | 12.2                    |
| <i>Xenopus tropicalis</i>           | 43.3        | 5622          | 111         | 2             | 98                | 71.2                       | -                       |
| <b>SCN5A (Na.1.5)</b>               | <b>GC %</b> | <b>Length</b> | <b>Gaps</b> | <b>% Gaps</b> | <b>% Complete</b> | <b>Pairwise % Identity</b> | <b>Average coverage</b> |
| <i>Ambystoma mexicanum</i>          | 48.9        | 5988          | 45          | 0.8           | 99.2              | 82.7                       | -                       |
| <i>Pleurodeles waltl</i>            | 44.7        | 5706          | 102         | 1.8           | 98.2              | 86.9                       | -                       |
| <i>Cryptobranchus alleganiensis</i> | 47          | 5961          | 33          | 0.6           | 99.4              | 81.6                       | 16.06                   |
| <i>Notophthalmus viridescens</i>    | 45.5        | 5943          | 42          | 0.7           | 99.3              | 88.6                       | 55.83                   |
| <i>Taricha granulosa</i>            | 45.7        | 5967          | 42          | 0.7           | 99.3              | 88.8                       | 58.51                   |
| <i>Taricha torosa</i>               | 45.7        | 5967          | 42          | 0.7           | 99.3              | 89.0                       | 36.8                    |
| <i>Salamandra salamandra</i>        | 45.7        | 5097          | 237         | 4.6           | 95.4              | 84.1                       | -                       |

|                                     |             |               |             |               |                   |                            |                         |
|-------------------------------------|-------------|---------------|-------------|---------------|-------------------|----------------------------|-------------------------|
| <i>Plethodon cinereus</i>           | 48.7        | 5961          | 48          | 0.8           | 99.2              | 81.8                       | 22.49                   |
| <i>Xenopus tropicalis</i>           | 47          | 5988          | 45          | 0.8           | 99.2              | 73.3                       | -                       |
| <b>SCN8A (Na,1.6)</b>               | <b>GC %</b> | <b>Length</b> | <b>Gaps</b> | <b>% Gaps</b> | <b>% Complete</b> | <b>Pairwise % Identity</b> | <b>Average coverage</b> |
| <i>Ambystoma mexicanum</i>          | 44.5        | 5946          | 30          | 0.5           | 99.5              | 88.0                       | -                       |
| <i>Pleurodeles waltl</i>            | 44.5        | 5691          | 84          | 1.5           | 98.5              | 90.0                       | -                       |
| <i>Cryptobranchus alleganiensis</i> | 44.7        | 5946          | 21          | 0.4           | 99.6              | 88.2                       | 21.26                   |
| <i>Notophthalmus viridescens</i>    | 44.7        | 5916          | 30          | 0.5           | 99.5              | 91.5                       | 49.65                   |
| <i>Taricha granulosa</i>            | 44.8        | 5952          | 30          | 0.5           | 99.5              | 91.7                       | 43.78                   |
| <i>Taricha torosa</i>               | 44.8        | 5907          | 30          | 0.5           | 99.5              | 91.8                       | 35.75                   |
| <i>Salamandra salamandra</i>        | 44.9        | 5946          | 30          | 0.5           | 99.5              | 90.8                       | -                       |
| <i>Plethodon cinereus</i>           | 44.7        | 5949          | 42          | 0.7           | 99.3              | 86.8                       | 32.32                   |
| <i>Xenopus tropicalis</i>           | 41.9        | 5946          | 18          | 0.3           | 99.7              | 79.1                       | -                       |

**Table S2.** Synonymous and nonsynonymous polymorphism in salamander SCNA sequences obtained for this study using targeted sequence capture.

|                                      | SCN1A        | SCN2A | SCN3A | SCN4A       | SCN5A | SCN8A |
|--------------------------------------|--------------|-------|-------|-------------|-------|-------|
| <b><i>C. alleganiensis</i> (n=2)</b> |              |       |       |             |       |       |
| Synonymous (P <sub>s</sub> )         | 3            | 4     | 1     | 1           | 2     | 0     |
| Nonsynonymous (P <sub>n</sub> )      | 0            | 2     | 0     | 0           | 0     | 0     |
| Insertions                           | 0            | 0     | 0     | 0           | 0     | 0     |
| Missing exons                        | 0            | 1     | 0     | 0           | 0     | 0     |
| <b><i>P. cinereus</i> (n=2)</b>      |              |       |       |             |       |       |
| Synonymous (P <sub>s</sub> )         | 0            | 3     | 3     | 6           | 4     | 0     |
| Nonsynonymous (P <sub>n</sub> )      | 1            | 0     | 0     | 1           | 0     | 0     |
| Insertions                           | 0            | 0     | 0     | 0           | 0     | 0     |
| Missing exons                        | 0            | 2     | 2     | 1           | 0     | 0     |
| <b><i>N. viridescens</i> (n=3)</b>   |              |       |       |             |       |       |
| Synonymous (P <sub>s</sub> )         | 24           | 22    | 35    | 19          | 11    | 12    |
| Nonsynonymous (P <sub>n</sub> )      | 5            | 2     | 4     | 8           | 1     | 1     |
| Insertions                           | 1 (39 bases) | 0     | 0     | 0           | 0     | 0     |
| Missing exons                        | 0            | 2     | 0     | 0           | 0     | 0     |
| <b><i>T. torosa</i> (n=3)</b>        |              |       |       |             |       |       |
| Synonymous (P <sub>s</sub> )         | 2            | 5     | 2     | 2           | 1     | 0     |
| Nonsynonymous (P <sub>n</sub> )      | 1            | 2     | 0     | 1           | 1     | 0     |
| Insertions                           | 0            | 0     | 0     | 1 (3 bases) | 0     | 0     |
| Missing exons                        | 0            | 2     | 0     | 0           | 0     | 0     |
| <b><i>T. granulosa</i> (n=3)</b>     |              |       |       |             |       |       |
| Synonymous (P <sub>s</sub> )         | 4            | 8     | 3     | 10          | 4     | 5     |
| Nonsynonymous (P <sub>n</sub> )      | 0            | 0     | 0     | 2           | 2     | 0     |
| Insertions                           | 0            | 0     | 0     | 0           | 0     | 0     |
| Missing exons                        | 0            | 2     | 0     | 0           | 0     | 0     |

**Table S3. Likelihood ratio tests from codeml site models.** Included for each paralog are summaries of likelihood-ratio tests ( $2\Delta\ell$ ) for site models using codeml from the PAML software program. Significance is indicated for p-values < 0.05 (\*) and < 0.01 (\*\*) with critical values determined from the  $\chi^2$  distribution.

|                                 | $\ell$    | n<br>Parameters | Parameter Estimates                                                                               | $2\Delta\ell$                                             |
|---------------------------------|-----------|-----------------|---------------------------------------------------------------------------------------------------|-----------------------------------------------------------|
| <b>SCN1A (Na.1.1)</b>           |           |                 |                                                                                                   |                                                           |
| Nearly neutral site model (M1a) | -20237.40 | 18              | $p_0 = 0.91, (p_1 = 0.09)$<br>$\omega_0 = 0.03, (\omega_1 = 1.00)$                                | -                                                         |
| Site selection model (M2a)      | -20237.40 | 20              | $p_0 = 0.91, p_1 = 0.09, (p_2 = 0.00)$<br>$\omega_0 = 0.03, (\omega_1 = 1.00), \omega_2 = 50.8$   | (M2a vs. M1a) <b>0.00</b>                                 |
| Site null model (M7)            | -20200.36 | 18              | $p = 0.11, q = 1.01$                                                                              | -                                                         |
| Site neutral model (M8a)        | -20193.38 | 19              | $p = 0.13, q = 1.69$                                                                              | -                                                         |
| Site selection model (M8)       | -20193.38 | 20              | $p_0 = 0.96, (p_1 = 0.04)$<br>$p = 0.13, q = 1.69$<br>$p_0 = 0.96, (p_1 = 0.04), \omega_1 = 1.00$ | (M7 vs. M8) <b>13.97**</b><br>(M8 vs. M8a) <b>0.00</b>    |
| <b>SCN2A (Na.1.2)</b>           |           |                 |                                                                                                   |                                                           |
| Nearly neutral site model (M1a) | -21559.11 | 18              | $p_0 = 0.89, (p_1 = 0.11)$<br>$\omega_0 = 0.05, (\omega_1 = 1.00)$                                | -                                                         |
| Site selection model (M2a)      | -21559.11 | 20              | $p_0 = 0.89, p_1 = 0.11, (p_2 = 0.00)$<br>$\omega_0 = 0.05, (\omega_1 = 1.00), \omega_2 = 45.2$   | (M2a vs. M1a) <b>0.00</b>                                 |
| Site null model (M7)            | -21481.17 | 18              | $p = 0.19, q = 1.43$                                                                              | -                                                         |
| Site neutral model (M8a)        | -21474.94 | 19              | $p = 0.22, q = 2.14$                                                                              | -                                                         |
| Site selection model (M8)       | -21474.89 | 20              | $p_0 = 0.97, (p_1 = 0.03)$<br>$p = 0.21, q = 2.07$<br>$p_0 = 0.98, (p_1 = 0.02), \omega_1 = 1.09$ | (M7 vs. M8) <b>12.56**</b><br>(M8 vs. M8a) <b>0.10</b>    |
| <b>SCN3A (Na.1.3)</b>           |           |                 |                                                                                                   |                                                           |
| Nearly neutral site model (M1a) | -21487.41 | 18              | $p_0 = 0.91, (p_1 = 0.09)$<br>$\omega_0 = 0.03, (\omega_1 = 1.00)$                                | -                                                         |
| Site selection model (M2a)      | -21487.41 | 20              | $p_0 = 0.91, p_1 = 0.09, (p_2 = 0.00)$<br>$\omega_0 = 0.03, (\omega_1 = 1.00), \omega_2 = 4.73$   | (M2a vs. M1a) <b>2.92</b>                                 |
| Site null model (M7)            | -21439.44 | 18              | $p = 0.12, q = 0.99$                                                                              | -                                                         |
| Site neutral model (M8a)        | -21406.75 | 19              | $p = 0.14, q = 1.84$                                                                              | -                                                         |
| Site selection model (M8)       | -21401.10 | 20              | $p_0 = 0.96, (p_1 = 0.04)$<br>$p = 0.13, q = 1.48$<br>$p_0 = 0.98, (p_1 = 0.02), \omega_1 = 1.83$ | (M7 vs. M8) <b>76.68**</b><br>(M8 vs. M8a) <b>11.30**</b> |
| <b>SCN4A (Na.1.4)</b>           |           |                 |                                                                                                   |                                                           |
| Nearly neutral site model (M1a) | -21877.67 | 18              | $p_0 = 0.83, (p_1 = 0.17)$<br>$\omega_0 = 0.03, (\omega_1 = 1.00)$                                | -                                                         |
| Site selection model (M2a)      | -21877.67 | 20              | $p_0 = 0.83, p_1 = 0.17, (p_2 = 0.00)$<br>$\omega_0 = 0.03 (\omega_1 = 1.00), \omega_2 = 123.5$   | (M2a vs. M1a) <b>0.00</b>                                 |
| Site null model (M7)            | -21820.89 | 18              | $p = 0.14, q = 0.76$                                                                              | -                                                         |
| Site neutral model (M8a)        | -21809.60 | 19              | $p = 0.17, q = 1.65$                                                                              | -                                                         |
| Site selection model (M8)       | -21807.68 | 20              | $p_0 = 0.93, (p_1 = 0.07)$<br>$p = 0.16, q = 1.27$<br>$p_0 = 0.96, (p_1 = 0.02), \omega_1 = 1.51$ | (M7 vs. M8) <b>26.42**</b><br>(M8 vs. M8a) <b>3.83*</b>   |
| <b>SCN5A (Na.1.5)</b>           |           |                 |                                                                                                   |                                                           |
| Nearly neutral site model (M1a) | -22525.65 | 18              | $p_0 = 0.88 (p_1 = 0.12)$<br>$\omega_0 = 0.04, (\omega_1 = 1.00)$                                 | -                                                         |
| Site selection model (M2a)      | -22523.34 | 20              | $p_0 = 0.88, p_1 = 0.12, (p_2 = 0.00)$<br>$\omega_0 = 0.03 (\omega_1 = 1.00), \omega_2 = 30.1$    | (M2a vs. M1a) <b>4.63</b>                                 |
| Site null model (M7)            | -22482.16 | 18              | $p = 0.15, q = 1.04$                                                                              | -                                                         |
| Site neutral model (M8a)        | -22465.19 | 19              | $p = 0.20, q = 2.28$                                                                              | -                                                         |
| Site selection model (M8)       | -22465.19 | 20              | $p_0 = 0.95, (p_1 = 0.05)$<br>$p = 0.20, q = 2.28$<br>$p_0 = 0.95, (p_1 = 0.05), \omega_1 = 1.00$ | (M7 vs. M8) <b>33.94**</b><br>(M8 vs. M8a) <b>0.00</b>    |

| <b>SCN8A (Na<sub>v</sub>1.6)</b> |           |    |                                                                                                                  |                                                        |
|----------------------------------|-----------|----|------------------------------------------------------------------------------------------------------------------|--------------------------------------------------------|
| Nearly neutral site model (M1a)  | -18903.82 | 18 | $p_0 = 0.94$ ( $p_1 = 0.06$ )<br>$\omega_0 = 0.02$ , ( $\omega_1 = 1.00$ )                                       | -                                                      |
| Site selection model (M2a)       | -18903.82 | 20 | $p_0 = 0.94$ , $p_1 = 0.06$ , ( $p_2 = 0.00$ )<br>$\omega_0 = 0.02$ ( $\omega_1 = 1.00$ ), $\omega_2 = 89.1$     | (M2a vs. M1a) <b>0.00</b>                              |
| Site null model (M7)             | -18911.33 | 18 | $p = 0.09$ , $q = 0.99$                                                                                          | -                                                      |
| Site neutral model (M8a)         | -18879.57 | 19 | $p = 0.12$ , $q = 2.25$                                                                                          | -                                                      |
| Site selection model (M8)        | -18878.56 | 20 | $p_0 = 0.97$ , ( $p_1 = 0.03$ )<br>$p = 0.11$ , $q = 1.70$<br>$p_0 = 0.98$ , ( $p_1 = 0.02$ ), $\omega_1 = 1.42$ | (M7 vs. M8) <b>65.54**</b><br>(M8 vs. M8a) <b>2.02</b> |

**Table S4. Likelihood ratio tests from codeml branch and branch-site models.** Included for each paralog are summaries of likelihood-ratio tests ( $2\Delta\ell$ ) for branch and branch-site models comparing TTX-bearing newts (foreground) with other salamanders (background) using codeml from the PAML software program. Significance is indicated for p-values < 0.05 (\*) and < 0.01 (\*\*) with critical values determined from the  $\chi^2$  distribution.

|                                 | $\ell$    | n<br>Parameters | Parameter Estimates                                                                             | $2\Delta\ell$                  |
|---------------------------------|-----------|-----------------|-------------------------------------------------------------------------------------------------|--------------------------------|
| <b>SCN1A (Na.1.1)</b>           |           |                 |                                                                                                 |                                |
| One ratio model (M0)            | -20546.55 | 17              | $\omega = 0.07$                                                                                 | -                              |
| Branch model                    | -20526.69 | 18              | $\omega$ salamanders = 0.07, $\omega$ newts = 0.17                                              | (Branch vs. M0) <b>39.71**</b> |
| Branch-site neutral model (A1)  | -20229.55 | 19              | $p_0 = 0.86, p_1 = 0.08, (p_2 = 0.05)$<br>$\omega_0 = 0.03, (\omega_1 = 1.00)$                  | -                              |
| Branch-site selection model (A) | -20229.55 | 20              | $p_0 = 0.86, p_1 = 0.08, (p_2 = 0.05)$<br>$\omega_0 = 0.03, (\omega_1 = 1.00), \omega_2 = 1.00$ | (A vs. A1) <b>0.00</b>         |
| <b>SCN2A (Na.1.2)</b>           |           |                 |                                                                                                 |                                |
| One ratio model (M0)            | -21838.97 | 17              | $\omega = 0.09$                                                                                 | -                              |
| Branch model                    | -21838.97 | 18              | $\omega$ salamanders = 0.09, $\omega$ newts = 0.09                                              | (Branch vs. M0) <b>0.00</b>    |
| Branch-site neutral model (A1)  | -21558.98 | 19              | $p_0 = 0.89, p_1 = 0.11, (p_2 = 0.00)$<br>$\omega_0 = 0.05, (\omega_1 = 1.00)$                  | -                              |
| Branch-site selection model (A) | -21558.52 | 20              | $p_0 = 0.89, p_1 = 0.11, (p_2 = 0.00)$<br>$\omega_0 = 0.05, (\omega_1 = 1.00), \omega_2 = 7.84$ | (A vs. A1) <b>0.94</b>         |
| <b>SCN3A (Na.1.3)</b>           |           |                 |                                                                                                 |                                |
| One ratio model (M0)            | -21867.12 | 17              | $\omega = 0.08$                                                                                 | -                              |
| Branch model                    | -21853.31 | 18              | $\omega$ salamanders = 0.07, $\omega$ newts = 0.15                                              | (Branch vs. M0) <b>27.63**</b> |
| Branch-site neutral model (A1)  | -21471.92 | 19              | $p_0 = 0.89, p_1 = 0.08, (p_2 = 0.03)$<br>$\omega_0 = 0.03, (\omega_1 = 1.00)$                  | -                              |
| Branch-site selection model (A) | -21468.13 | 20              | $p_0 = 0.90, p_1 = 0.09, (p_2 = 0.01)$<br>$\omega_0 = 0.03, (\omega_1 = 1.00), \omega_2 = 5.50$ | (A vs. A1) <b>7.59*</b>        |
| <b>SCN4A (Na.1.4)</b>           |           |                 |                                                                                                 |                                |
| One ratio model (M0)            | -22400.36 | 17              | $\omega = 0.11$                                                                                 | -                              |
| Branch model                    | -22380.87 | 18              | $\omega$ salamanders = 0.10, $\omega$ newts = 0.25                                              | (Branch vs. M0) <b>38.96**</b> |
| Branch-site neutral model (A1)  | -21859.15 | 19              | $p_0 = 0.75, p_1 = 0.17, (p_2 = 0.08)$<br>$\omega_0 = 0.03, (\omega_1 = 1.00)$                  | -                              |
| Branch-site selection model (A) | -21858.94 | 20              | $p_0 = 0.78, p_1 = 0.16, (p_2 = 0.06)$<br>$\omega_0 = 0.03, (\omega_1 = 1.00), \omega_2 = 1.61$ | (A vs. A1) <b>0.42</b>         |
| <b>SCN5A (Na.1.5)</b>           |           |                 |                                                                                                 |                                |
| One ratio model (M0)            | -22980.74 | 17              | $\omega = 0.09$                                                                                 | -                              |
| Branch model                    | -22978.73 | 18              | $\omega$ salamanders = 0.09, $\omega$ newts = 0.12                                              | (Branch vs. M0) <b>4.00</b>    |
| Branch-site neutral model (A1)  | -22525.65 | 19              | $p_0 = 0.88, p_1 = 0.11, (p_2 = 0.00)$<br>$\omega_0 = 0.02, (\omega_1 = 1.00)$                  | -                              |
| Branch-site selection model (A) | -22525.65 | 20              | $p_0 = 0.88, p_1 = 0.11, (p_2 = 0.00)$<br>$\omega_0 = 0.02, (\omega_1 = 1.00), \omega_2 = 66.9$ | (A vs. A1) <b>0.00</b>         |
| <b>SCN8A (Na.1.6)</b>           |           |                 |                                                                                                 |                                |
| One ratio model (M0)            | -19187.81 | 17              | $\omega = 0.06$                                                                                 | -                              |
| Branch model                    | -19183.65 | 18              | $\omega$ salamanders = 0.05, $\omega$ newts = 0.09                                              | (Branch vs. M0) <b>8.33*</b>   |
| Branch-site neutral model (A1)  | -18903.82 | 19              | $p_0 = 0.94, p_1 = 0.06, (p_2 = 0.00)$<br>$\omega_0 = 0.02, (\omega_1 = 1.00)$                  | -                              |
| Branch-site selection model (A) | -18903.82 | 20              | $p_0 = 0.94, p_1 = 0.06, (p_2 = 0.00)$<br>$\omega_0 = 0.02, (\omega_1 = 1.00), \omega_2 = 1.00$ | (A vs. A1) <b>0.00</b>         |



**Table S5. Sites with elevated  $d_N/d_S$  in toxic newts.** Positively selected sites were identified using branch site models from the PAML software. Numbers indicate posterior probabilities of positive selection from empirical Bayes estimates. Known TTX-binding sites are bolded. Site numbers reference amino acid positions in the rat Nav1.4 channel (accession number AAA41682). Sites under putative positive selection without a homologous amino acid site in rat Nav1.4 are excluded from this table.

| Site        | Exon      | Nav1.1 | Nav1.2 | Nav1.3      | Nav1.4      | Nav1.5 | Nav1.6 |
|-------------|-----------|--------|--------|-------------|-------------|--------|--------|
| 12          | 1         |        |        |             | 0.61        |        |        |
| 27          | 1         |        | 0.91   | 0.55        |             |        |        |
| 120         | 2         |        |        |             |             | 0.77   | 0.75   |
| 150         | 3         |        |        |             | 0.56        |        |        |
| 155         | 3         | 0.53   |        |             |             |        |        |
| 249         | 6         | 0.64   |        |             |             |        |        |
| 278         | 6         | 0.58   |        |             |             |        |        |
| 338         | 6         |        |        | 0.56        |             |        |        |
| 340         | 6         | 0.79   |        |             |             |        |        |
| 452         | 9         |        |        | 0.61        |             |        |        |
| 460         | 9         |        |        | 0.60        |             |        |        |
| 493         | 10        | 0.54   |        |             |             |        |        |
| 543         | 13        |        |        | 0.98        |             |        |        |
| 549         | 13        |        |        | 0.55        |             |        |        |
| 621         | 14        |        |        | 0.59        |             |        |        |
| 719         | 15        |        |        | 0.58        |             |        |        |
| <b>756</b>  | <b>15</b> |        |        |             | <b>0.95</b> |        |        |
| <b>759</b>  | <b>15</b> |        |        | <b>0.61</b> |             |        |        |
| 767         | 15        |        |        | 0.61        |             |        |        |
| 774         | 15        |        |        | 0.66        |             |        |        |
| 829         | 16        | 0.53   |        |             |             |        |        |
| 837         | 16        | 0.60   |        |             | 0.53        |        |        |
| 842         | 16        | 0.59   |        |             |             |        |        |
| 843         | 16        |        |        | 0.51        |             |        |        |
| 845         | 16        | 0.60   |        |             |             |        |        |
| 877         | 16        | 0.51   |        |             |             |        |        |
| 879         | 16        |        |        | 0.57        |             |        |        |
| 881         | 16        | 0.60   |        |             |             |        |        |
| 884         | 16        |        |        | 0.97        |             |        |        |
| 887         | 16        |        |        | 0.60        |             |        |        |
| 898         | 16        |        |        | 0.59        |             |        |        |
| 911         | 16        | 0.61   |        |             |             |        |        |
| 921         | 16        | 0.51   |        |             |             |        | 0.74   |
| 936         | 16        | 0.53   |        |             |             |        |        |
| 940         | 16        |        |        |             |             | 0.69   |        |
| 946         | 17        | 0.60   |        |             |             |        |        |
| 957         | 17        | 0.58   |        |             |             |        |        |
| 960         | 17        | 0.59   |        |             |             |        |        |
| 965         | 17        | 0.95   |        |             |             |        |        |
| 968         | 17        | 0.53   |        |             |             |        |        |
| 981         | 17        |        |        |             | 0.53        |        |        |
| 993         | 18        |        |        |             | 0.53        |        |        |
| 1006        | 18        |        |        | 0.51        | 0.53        |        |        |
| 1028        | 18        |        |        |             | 0.98        |        |        |
| 1046        | 19        |        |        |             | 0.51        |        |        |
| 1127        | 20        |        |        |             |             | 0.56   |        |
| 1179        | 21        | 0.59   |        |             |             |        |        |
| 1187        | 21        |        |        |             | 0.52        |        |        |
| 1189        | 21        | 0.51   |        |             |             |        |        |
| 1191        | 21        |        |        | 0.86        |             |        |        |
| 1194        | 21        | 0.60   |        | 0.83        |             |        |        |
| 1224        | 21        | 0.61   |        |             |             |        |        |
| <b>1240</b> | <b>22</b> |        |        |             | <b>0.51</b> |        |        |
| 1250        | 22        | 0.61   |        |             |             |        |        |
| 1254        | 23        |        |        | 0.54        |             |        |        |
| 1257        | 23        |        |        | 0.97        |             |        |        |
| 1261        | 23        | 0.52   |        |             |             |        |        |
| 1262        | 23        | 0.61   |        |             |             |        |        |

|             |           |             |      |             |
|-------------|-----------|-------------|------|-------------|
| 1367        | 25        | 0.60        |      |             |
| 1383        | 25        |             |      | 0.52        |
| 1390        | 25        |             |      | 0.54        |
| <b>1519</b> | <b>26</b> |             |      | <b>0.51</b> |
| <b>1529</b> | <b>26</b> | <b>0.52</b> |      |             |
| <b>1532</b> | <b>26</b> |             |      | <b>0.98</b> |
| 1542        | 26        |             | 0.60 |             |
| 1631        | 26        | 0.52        |      |             |
| 1719        | 26        |             |      | 0.56        |
| 1737        | 26        |             | 0.56 |             |
| 1738        | 26        |             | 0.51 |             |
| 1739        | 26        | 0.53        |      |             |
| 1741        | 26        |             | 0.51 |             |
| 1744        | 26        |             | 0.54 |             |
| 1748        | 26        |             | 0.52 |             |
| 1752        | 26        |             | 0.83 |             |
| 1774        | 26        | 0.61        |      |             |
| 1796        | 26        | 0.56        |      |             |
| 1817        | 26        | 0.59        |      |             |
| 1820        | 26        | 0.59        |      |             |
| 1827        | 26        | 0.51        |      |             |
| 1832        | 26        | 0.52        |      |             |
| 1939        | 26        | 0.52        |      |             |

---

**Table S6. Sites under putative positive selection in all salamanders.** Positively selected sites were identified using site models M2a and M8 in codeml from the PAML software. Numbers indicate posterior probabilities of positive selection from empirical Bayes estimates. A single value indicates detection from the M8 model only, and two values indicate detection from both the M2a model and M8 models. Known TTX-binding sites are bolded. Site numbers reference amino acid positions in the rat Na<sub>v</sub>1.4 channel (accession number AAA41682). Sites under positive selection without a homologous amino acid site in rat Na<sub>v</sub>1.4 are excluded from this table.

| Site       | Exon     | Na <sub>v</sub> 1.1 | Na <sub>v</sub> 1.2 | Na <sub>v</sub> 1.3 | Na <sub>v</sub> 1.4 | Na <sub>v</sub> 1.5 | Na <sub>v</sub> 1.6 |
|------------|----------|---------------------|---------------------|---------------------|---------------------|---------------------|---------------------|
| 19         | 1        |                     |                     | 0.58; 0.81          |                     |                     |                     |
| 22         | 1        |                     |                     |                     |                     |                     | 0.70; 0.93          |
| 43         | 1        |                     |                     | 0.75; 0.95          |                     |                     |                     |
| 46         | 1        |                     | 0.51; 0.60          |                     |                     |                     |                     |
| 51         | 1        |                     |                     |                     | 0.51                |                     |                     |
| 56         | 1        |                     |                     | 0.56; 0.79          |                     |                     |                     |
| 73         | 1        | 0.52; 0.63          |                     | 0.51                |                     | 0.60; 0.84          | 0.68; 0.91          |
| 74         | 1        |                     |                     |                     |                     |                     | 0.76; 0.96          |
| 80         | 1        |                     |                     |                     |                     | 0.54                |                     |
| 115        | 2        |                     |                     |                     | 0.84                |                     |                     |
| 155        | 3        |                     |                     |                     |                     | 0.52                |                     |
| 185        | 4        |                     |                     |                     |                     | 0.90; 0.99          |                     |
| 202        | 4        |                     |                     | 0.56                |                     |                     |                     |
| 209        | 5        |                     |                     |                     |                     | 0.62                |                     |
| 287        | 6        | 0.65; 0.88          | 0.51; 0.83          |                     |                     |                     |                     |
| 289        | 6        | 0.54                |                     |                     | 0.74                |                     |                     |
| 290        | 6        |                     | 0.56; 0.67          |                     | 0.73                |                     |                     |
| 294        | 6        | 0.62; 0.85          |                     |                     |                     | 0.52                |                     |
| 295        | 6        |                     |                     |                     |                     | 0.67; 0.93          |                     |
| 298        | 6        | 0.56; 0.78          |                     |                     |                     | 0.51; 0.71          | 0.60                |
| 300        | 6        | 0.53; 0.70          | 0.60; 0.82          |                     |                     |                     |                     |
| 301        | 6        |                     |                     |                     |                     | 0.56                |                     |
| 302        | 6        | 0.51; 0.62          | 0.56; 0.68          | 0.65; 0.88          |                     |                     |                     |
| 306        | 6        |                     | 0.71; 0.91          |                     |                     |                     |                     |
| 307        | 6        |                     |                     | 0.68; 0.92          |                     | 0.53                |                     |
| 309        | 6        |                     |                     | 0.59; 0.81          |                     | 0.60                |                     |
| 311        | 6        |                     |                     |                     |                     | 0.58                |                     |
| 325        | 6        |                     |                     |                     | 0.80                |                     |                     |
| 326        | 6        |                     |                     |                     | 0.69                |                     |                     |
| 328        | 6        |                     | 0.53                |                     |                     |                     |                     |
| 329        | 6        |                     |                     | 0.51; 0.66          |                     |                     |                     |
| 330        | 6        |                     |                     |                     |                     | 0.53                |                     |
| 332        | 6        |                     |                     |                     |                     |                     | 0.54; 0.72          |
| 333        | 6        | 0.66                |                     | 0.64; 0.88          |                     |                     | 0.56; 0.77          |
| 337        | 6        |                     | 0.70; 0.90          | 0.81; 0.98          |                     |                     |                     |
| 338        | 6        | 0.55; 0.75          |                     |                     |                     |                     |                     |
| 339        | 6        | 0.61; 0.82          | 0.61; 0.75          |                     |                     |                     | 0.57; 0.79          |
| 340        | 6        |                     |                     | 0.62                |                     | 0.63                | 0.52; 0.61          |
| 344        | 7        | 0.60; 0.80          | 0.64; 0.82          | 0.51; 0.67          |                     | 0.55                |                     |
| 345        | 7        |                     |                     |                     |                     | 0.69; 0.93          | 0.52; 0.61          |
| 346        | 7        |                     |                     |                     |                     | 0.69; 0.94          |                     |
| 348        | 7        |                     |                     | 0.70; 0.92          |                     | 0.66; 0.90          |                     |
| 351        | 7        | 0.60; 0.81          |                     |                     |                     |                     |                     |
| 358        | 7        | 0.55; 0.71          | 0.58; 0.72          |                     |                     |                     |                     |
| 365        | 8        |                     |                     | 0.59; 0.80          |                     | 0.62; 0.88          |                     |
| 366        | 8        |                     |                     |                     |                     | 0.52; 0.73          |                     |
| 368        | 8        | 0.52; 0.70          | 0.56; 0.71          |                     | 0.65                |                     | 0.60; 0.82          |
| 374        | 8        |                     |                     |                     |                     |                     | 0.62                |
| <b>401</b> | <b>8</b> | <b>0.61; 0.85</b>   |                     | <b>0.51; 0.65</b>   |                     |                     | <b>0.51; 0.68</b>   |
| 485        | 10       | 0.51; 0.64          |                     |                     |                     |                     |                     |
| 487        | 10       | 0.53; 0.71          |                     |                     |                     |                     |                     |
| 555        | 13       | 0.58; 0.74          | 0.53; 0.61          | 0.78; 0.97          |                     |                     |                     |
| 557        | 13       | 0.60                |                     | 0.68; 0.91          | 0.82                |                     | 0.53; 0.62          |
| 560        | 13       | 0.65                |                     |                     |                     |                     |                     |
| 563        | 13       | 0.66; 0.88          |                     |                     |                     | 0.56                |                     |
| 567        | 13       |                     |                     |                     |                     |                     | 0.51                |

|      |    |            |            |            |      |            |            |
|------|----|------------|------------|------------|------|------------|------------|
| 598  | 13 | 0.62; 0.87 |            |            | 0.53 | 0.73; 0.96 | 0.57; 0.81 |
| 601  | 13 |            |            | 0.80; 0.97 |      |            |            |
| 602  | 13 |            |            |            |      | 0.66; 0.91 | 0.65; 0.85 |
| 606  | 13 | 0.52       |            |            |      |            |            |
| 609  | 13 |            |            |            |      | 0.53       |            |
| 654  | 14 |            |            | 0.76; 0.96 |      |            |            |
| 728  | 15 | 0.57; 0.65 |            |            |      |            |            |
| 729  | 15 |            |            | 0.51; 0.64 | 0.89 | 0.50; 0.71 | 0.75; 0.96 |
| 732  | 15 | 0.52; 0.56 |            | 0.61; 0.81 | 0.64 | 0.71; 0.94 |            |
| 739  | 15 |            |            |            |      | 0.54; 0.79 |            |
| 774  | 15 | 0.70; 0.90 |            |            |      |            |            |
| 828  | 16 |            |            |            |      | 0.70       |            |
| 830  | 16 |            |            |            |      |            | 0.87; 0.99 |
| 832  | 16 | 0.55       | 0.57       |            |      |            | 0.85; 0.99 |
| 840  | 16 |            |            |            |      |            | 0.53; 0.71 |
| 841  | 16 |            |            |            |      | 0.64       |            |
| 846  | 16 |            |            |            |      | 0.61       |            |
| 848  | 16 |            |            |            |      | 0.57; 0.82 |            |
| 849  | 16 |            |            |            |      |            | 0.51       |
| 850  | 16 |            |            |            |      | 0.63       |            |
| 852  | 16 |            |            | 0.56; 0.69 |      | 0.55; 0.80 |            |
| 864  | 16 |            |            | 0.54; 0.66 |      |            |            |
| 877  | 16 |            |            |            |      | 0.68; 0.93 |            |
| 878  | 16 |            |            |            |      | 0.61       |            |
| 881  | 16 |            |            |            |      | 0.51       |            |
| 886  | 16 |            |            |            |      | 0.52; 0.76 |            |
| 887  | 16 | 0.58       |            |            |      |            |            |
| 892  | 16 |            |            |            | 0.88 |            |            |
| 899  | 16 |            |            |            |      | 0.54       |            |
| 912  | 16 | 0.60; 0.82 |            |            |      |            |            |
| 913  | 16 | 0.64; 0.82 |            |            |      |            |            |
| 945  | 17 |            |            |            | 0.51 |            |            |
| 947  | 17 |            |            |            | 0.72 |            |            |
| 950  | 17 |            |            |            |      | 0.64       |            |
| 951  | 17 |            |            | 0.73; 0.94 |      |            |            |
| 952  | 17 | 0.55       |            |            |      |            |            |
| 967  | 17 | 0.53; 0.70 |            |            |      |            |            |
| 971  | 17 |            |            |            | 0.78 |            |            |
| 972  | 17 | 0.69; 0.91 |            |            | 0.55 |            |            |
| 976  | 17 |            |            |            |      | 0.53       |            |
| 978  | 17 | 0.58; 0.79 |            |            |      |            |            |
| 979  | 17 |            |            | 0.86; 0.99 |      |            |            |
| 980  | 17 |            |            |            |      | 0.52; 0.72 |            |
| 981  | 17 | 0.53; 0.71 |            |            |      |            |            |
| 985  | 17 |            |            |            |      |            | 0.64       |
| 997  | 18 |            |            |            | 0.68 |            |            |
| 999  | 18 | 0.59       |            |            |      |            |            |
| 1003 | 18 |            |            |            |      | 0.61       |            |
| 1004 | 18 |            |            | 0.76; 0.96 |      |            |            |
| 1006 | 18 |            |            |            |      | 0.68; 0.92 |            |
| 1009 | 18 | 0.64; 0.85 |            |            |      | 0.52; 0.74 | 0.77; 0.97 |
| 1012 | 18 |            |            |            |      | 0.52; 0.75 |            |
| 1106 | 20 |            |            |            |      | 0.55; 0.79 |            |
| 1111 | 20 |            |            |            |      | 0.64; 0.88 |            |
| 1113 | 20 |            |            |            |      | 0.62; 0.85 |            |
| 1115 | 20 |            |            |            |      | 0.65       |            |
| 1187 | 21 |            |            | 0.50; 0.66 |      |            |            |
| 1188 | 21 |            |            |            |      | 0.57; 0.82 |            |
| 1189 | 21 |            |            | 0.54; 0.68 |      |            | 0.53       |
| 1192 | 21 |            |            | 0.72; 0.93 |      |            |            |
| 1193 | 21 | 0.70; 0.93 | 0.63; 0.86 | 0.87; 0.99 |      |            | 0.73; 0.93 |
| 1195 | 21 |            |            | 0.57; 0.82 | 0.60 |            |            |
| 1203 | 21 | 0.59; 0.78 |            |            |      |            | 0.64; 0.88 |
| 1204 | 21 | 0.58       |            | 0.53       |      |            | 0.69; 0.92 |
| 1207 | 21 | 0.60; 0.81 |            | 0.88; 0.99 |      | 0.61; 0.86 |            |
| 1208 | 21 |            |            | 0.60; 0.81 |      |            | 0.55; 0.74 |
| 1211 | 21 |            |            |            | 0.80 |            |            |
| 1216 | 21 |            |            |            |      | 0.58       |            |
| 1251 | 22 |            |            | 0.67; 0.88 |      |            |            |
| 1253 | 23 | 0.57; 0.80 |            |            |      |            |            |

|             |           |                   |                   |            |            |            |
|-------------|-----------|-------------------|-------------------|------------|------------|------------|
| 1254        | 23        | 0.59; 0.81        |                   |            |            |            |
| 1257        | 23        |                   |                   | 0.77       |            |            |
| 1260        | 23        |                   | 0.52              |            |            |            |
| 1332        | 24        | 0.64; 0.85        | 0.53; 0.66        |            |            |            |
| 1334        | 25        |                   | 0.65; 0.87        |            |            |            |
| 1351        | 25        |                   |                   | 0.56       |            |            |
| 1372        | 25        |                   |                   |            | 0.69; 0.92 |            |
| 1380        | 25        | 0.57              |                   | 0.69       |            |            |
| 1390        | 25        |                   |                   |            | 0.62       |            |
| <b>1533</b> | <b>26</b> | <b>0.50; 0.67</b> | <b>0.55; 0.71</b> |            |            |            |
| 1542        | 26        |                   |                   |            | 0.66       |            |
| 1543        | 26        | 0.67; 0.90        |                   |            | 0.70       |            |
| 1549        | 26        | 0.50; 0.66        |                   | 0.66; 0.89 | 0.54       |            |
| 1550        | 26        |                   |                   |            | 0.61       |            |
| 1551        | 26        |                   | 0.58; 0.78        | 0.68; 0.91 |            | 0.57; 0.80 |
| 1556        | 26        |                   |                   |            | 0.84       |            |
| 1558        | 26        |                   |                   |            | 0.77       | 0.56       |
| 1623        | 26        |                   | 0.56; 0.78        |            |            |            |
| 1631        | 26        |                   |                   | 0.53       |            |            |
| 1635        | 26        | 0.53              |                   |            |            |            |
| 1708        | 26        |                   |                   | 0.81       |            |            |
| 1725        | 26        | 0.60              |                   |            |            | 0.58; 0.83 |
| 1726        | 26        |                   | 0.62; 0.81        |            |            |            |
| 1733        | 26        | 0.62; 0.81        |                   |            |            |            |
| 1736        | 26        |                   |                   | 0.63       |            |            |
| 1739        | 26        |                   | 0.56; 0.70        |            |            |            |
| 1742        | 26        |                   |                   | 0.77       |            |            |
| 1745        | 26        |                   | 0.53; 0.66        |            |            |            |
| 1746        | 26        |                   | 0.70; 0.92        | 0.82       |            |            |
| 1747        | 26        |                   | 0.62; 0.83        | 0.74       |            |            |
| 1748        | 26        |                   | 0.63; 0.84        |            |            |            |
| 1751        | 26        |                   |                   | 0.67       |            |            |
| 1754        | 26        |                   |                   | 0.80       |            |            |
| 1755        | 26        | 0.62; 0.79        | 0.57              |            |            |            |
| 1757        | 26        |                   |                   |            |            |            |
| 1767        | 26        |                   |                   | 0.61       |            |            |
| 1769        | 26        |                   |                   | 0.61       |            |            |
| 1775        | 26        |                   |                   | 0.88       |            |            |
| 1777        | 26        |                   |                   | 0.50       |            |            |
| 1784        | 26        |                   |                   | 0.54       |            |            |
| 1798        | 26        |                   |                   | 0.88       |            |            |
| 1800        | 26        |                   |                   | 0.78       |            |            |
| 1805        | 26        |                   |                   | 0.58       |            |            |
| 1807        | 26        |                   |                   | 0.91       |            |            |
| 1822        | 26        |                   | 0.58; 0.82        |            |            |            |
| 1828        | 26        |                   |                   |            | 0.62       |            |
| 1831        | 26        |                   |                   | 0.76       |            |            |
| 1834        | 26        |                   |                   | 0.53; 0.93 |            |            |
| 1835        | 26        |                   |                   | 0.91       |            |            |

---

**Table S8. Sources for amphibian voltage-gated sodium channel (SCNA) sequences used for targeted NGS sequencing probe design. WGS – whole genome shotgun database, TSA – transcriptome shotgun assembly database**

| <b>Species</b>             | <b>Source</b> | <b>Best BLAST hit</b> | <b>Accession</b>                                                                                                                                                                                                                                                                          |
|----------------------------|---------------|-----------------------|-------------------------------------------------------------------------------------------------------------------------------------------------------------------------------------------------------------------------------------------------------------------------------------------|
| <i>Ambystoma mexicanum</i> | WGS NCBI      | SCN1A                 | gb PGSH01113157.1                                                                                                                                                                                                                                                                         |
| <i>Ambystoma mexicanum</i> | WGS NCBI      | SCN2A, SCN3A          | gb PGSH01109388.1                                                                                                                                                                                                                                                                         |
| <i>Ambystoma mexicanum</i> | WGS NCBI      | SCN4A                 | gb PGSH01101866.1,<br>gb PGSH01095590.1,<br>gb JXRH01331098.1                                                                                                                                                                                                                             |
| <i>Ambystoma mexicanum</i> | WGS NCBI      | SCN5A                 | gb PGSH01008813.1                                                                                                                                                                                                                                                                         |
| <i>Ambystoma mexicanum</i> | WGS NCBI      | SCN8A                 | gb PGSH01049067.1                                                                                                                                                                                                                                                                         |
| <i>Hynobius chinensis</i>  | TSA NCBI      | SCN1A                 | gb GAQK01012416.1,<br>gb GAQK01089723.1,<br>gb GAQK01123640.1,<br>gb GAQK01022956.1,<br>gb GAQK01037701.1,<br>gb GAQK01110837.1,<br>gb GAQK01035933.1,<br>gb GAQK01049457.1,<br>gb GAQK01026323.1,<br>gb GAQK01118202.1,<br>gb GAQK01062486.1,<br>gb GAQK01026323.1,<br>gb GAQK01062486.1 |
| <i>Hynobius chinensis</i>  | TSA NCBI      | SCN2A                 | gb GAQK01012415.1,<br>gb GAQK01089724.1,<br>gb GAQK01123639.1,<br>gb GAQK01062305.1,<br>gb GAQK01047585.1,<br>gb GAQK01096581.1,<br>gb GAQK01044980.1,<br>gb GAQK01086119.1,<br>gb GAQK01096592.1,<br>gb GAQK01106518.1,<br>gb GAQK01122588.1                                             |
| <i>Hynobius chinensis</i>  | TSA NCBI      | SCN4A                 | gb GAQK01140156.1,<br>gb GAQK01024534.1,<br>gb GAQK01021831.1,<br>gb GAQK01021830.1,<br>gb GAQK01082803.1,<br>gb GAQK01071419.1,<br>gb GAQK01071419.1                                                                                                                                     |
| <i>Hynobius chinensis</i>  | TSA NCBI      | SCN5A                 | gb GAQK01128205.1,<br>gb GAQK01083790.1,<br>gb GAQK01027263.1,<br>gb GAQK01027805.1,<br>gb GAQK01015614.1,<br>gb GAQK01012146.1,<br>gb GAQK01014539.1,<br>gb GAQK01014539.1                                                                                                               |
| <i>Hynobius chinensis</i>  | TSA NCBI      | SCN8A                 | gb GAQK01067521.1,<br>gb GAQK01020756.1,<br>gb GAQK01038507.1,<br>gb GAQK01045113.1,<br>gb GAQK01022217.1,<br>gb GAQK01096591.1,<br>gb GAQK01071418.1,<br>gb GAQK01071418.1                                                                                                               |
| <i>Hynobius retardatus</i> | TSA NCBI      | SCN1A                 | gb LE210884.1, gb LE107081.1,<br>gb LE105972.1                                                                                                                                                                                                                                            |
| <i>Hynobius retardatus</i> | TSA NCBI      | SCN3A                 | gb LE175129.1                                                                                                                                                                                                                                                                             |
| <i>Hynobius retardatus</i> | TSA NCBI      | SCN4A                 | gb LE175126.1, gb LE175128.1                                                                                                                                                                                                                                                              |

|                                       |                                                                                                                               |                     |                                                                            |
|---------------------------------------|-------------------------------------------------------------------------------------------------------------------------------|---------------------|----------------------------------------------------------------------------|
| <i>Hynobius retardatus</i>            | TSA NCBI                                                                                                                      | SCN5A               | gb LE143587.1, gb LE143588.1                                               |
| <i>Hynobius retardatus</i>            | TSA NCBI                                                                                                                      | SCN8A               | gb LE175125.1                                                              |
| <i>Lyciasalamandra atifi</i>          | Transcriptome assembly provided by Miguel Vences (Rodríguez et al. 2017)                                                      | -                   | -                                                                          |
| <i>Nanorana parkeri</i>               | WGS NCBI                                                                                                                      | SCN1A, SCN2A, SCN3A | gb NW_017306417.1                                                          |
| <i>Nanorana parkeri</i>               | WGS NCBI                                                                                                                      | SCN4A               | gb NW_017306748.1                                                          |
| <i>Nanorana parkeri</i>               | WGS NCBI                                                                                                                      | SCN5A               | gb NW_017306389.1                                                          |
| <i>Nanorana parkeri</i>               | WGS NCBI                                                                                                                      | SCN8A               | gb NW_017307114.1                                                          |
| <i>Notophthalmus viridescens</i>      | <a href="http://sandberg.cmb.ki.se/redspottednewt/">http://sandberg.cmb.ki.se/redspottednewt/</a>                             | -                   | -                                                                          |
| <i>Paramesotriton hongkonginensis</i> | Sequence Read Archive NCBI SRX796492                                                                                          | -                   | -                                                                          |
| <i>Pleurodeles waltl</i>              | Whole genome assembly provided by Ahmed Elewa (Elewa et al. 2017)                                                             | SCN1A               | abyss_v4.2_66066951                                                        |
| <i>Pleurodeles waltl</i>              | Transcriptome assembly from iNewt Database: <a href="http://www.nibb.ac.jp/imori/main/">http://www.nibb.ac.jp/imori/main/</a> | SCN1A               | TRINITY_DN288824_c1_g3_i7                                                  |
| <i>Pleurodeles waltl</i>              | Whole genome assembly provided by Ahmed Elewa (Elewa et al. 2017)                                                             | SCN2A               | abyss_v4.2_66112789                                                        |
| <i>Pleurodeles waltl</i>              | Whole genome assembly provided by Ahmed Elewa (Elewa et al. 2017)                                                             | SCN3A               | abyss_v4.2_66060341                                                        |
| <i>Pleurodeles waltl</i>              | Transcriptome assembly from iNewt Database: <a href="http://www.nibb.ac.jp/imori/main/">http://www.nibb.ac.jp/imori/main/</a> | SCN3A               | TRINITY_DN288824_c1_g3_i6                                                  |
| <i>Pleurodeles waltl</i>              | Whole genome assembly provided by Ahmed Elewa (Elewa et al. 2017)                                                             | SCN4A               | abyss_v4.2_48183054                                                        |
| <i>Pleurodeles waltl</i>              | Transcriptome assembly from iNewt Database: <a href="http://www.nibb.ac.jp/imori/main/">http://www.nibb.ac.jp/imori/main/</a> | SCN4A               | TRINITY_DN288824_c1_g2_i5                                                  |
| <i>Pleurodeles waltl</i>              | Whole genome assembly provided by Ahmed Elewa (Elewa et al. 2017)                                                             | SCN5A               | abyss_v4.2_66164693                                                        |
| <i>Pleurodeles waltl</i>              | Whole genome assembly provided by Ahmed Elewa (Elewa et al. 2017)                                                             | SCN8A               | abyss_v4.2_66123907                                                        |
| <i>Salamandra atra</i>                | Transcriptome assembly provided by Miguel Vences (Rodríguez et al. 2017)                                                      | -                   | -                                                                          |
| <i>Salamandra infraimmaculata</i>     | Transcriptome assembly provided by Miguel Vences (Rodríguez et al. 2017)                                                      | -                   | -                                                                          |
| <i>Salamandra salamandra</i>          | TSA NCBI                                                                                                                      | SCN1A               | gb GIKK01030996.1, gb GIKK01027377.1, gb GIKK01026170.1, gb GIKK01027688.1 |
| <i>Salamandra salamandra</i>          | TSA NCBI                                                                                                                      | SCN2A               | gb GIKK01012950.1, gb GIKK01007670.1, gb GIKK01006682.1                    |
| <i>Salamandra salamandra</i>          | TSA NCBI                                                                                                                      | SCN3A               | gb GIKK01031859.1                                                          |
| <i>Salamandra salamandra</i>          | TSA NCBI                                                                                                                      | SCN4A               | gb GIKK01007017.1, gb GIKK01015583.1                                       |
| <i>Salamandra salamandra</i>          | TSA NCBI                                                                                                                      | SCN5A               | gb GIKK01011042.1                                                          |
| <i>Salamandra salamandra</i>          | TSA NCBI                                                                                                                      | SCN8A               | gb GIKK01019313.1, gb GIKK01023854.1, gb GIKK01002548.1                    |

|                                  |          |       |                                                                                                                                                       |
|----------------------------------|----------|-------|-------------------------------------------------------------------------------------------------------------------------------------------------------|
| <i>Tylototriton wenxianensis</i> | TSA NCBI | SCN4A | gb GESS01000732.1,<br>gb GESS01024789.1,<br>gb GESS01029581.1,<br>gb GESS01063809.1                                                                   |
| <i>Tylototriton wenxianensis</i> | TSA NCBI | SCN5A | gb GESS01016882.1,<br>gb GESS01035197.1                                                                                                               |
| <i>Xenopus tropicalis</i>        | WGS NCBI | SCN1A | gb AAMC03035440.1                                                                                                                                     |
| <i>Xenopus tropicalis</i>        | WGS NCBI | SCN2A | gb AAMC03035445.1                                                                                                                                     |
| <i>Xenopus tropicalis</i>        | WGS NCBI | SCN3A | gb AAMC03035458.1,<br>gb AAMC03035459.1,<br>gb AAMC03035460.1                                                                                         |
| <i>Xenopus tropicalis</i>        | WGS NCBI | SCN4A | gb AAMC03036452.1                                                                                                                                     |
| <i>Xenopus tropicalis</i>        | WGS NCBI | SCN5A | gb AAMC03022243.1,<br>gb AAMC03022245.1,<br>gb AAMC03022246.1,<br>gb AAMC03022247.1,<br>gb AAMC03022249.1,<br>gb AAMC03022250.1,<br>gb AAMC03022251.1 |
| <i>Xenopus tropicalis</i>        | WGS NCBI | SCN8A | gb AAMC03008918.1,<br>gb AAMC03008917.1,<br>gb AAMC03008916.1                                                                                         |

---
